# Supplementary material for: New Polyketides and New Benzoic Acid Derivatives from the Marine Sponge-Associated Fungus Neosartorya quadricincta KUFA 0081
Source: MDPI journal article supplement (doi:10.3390/md14070134), 2016-07-16
Supplement: s1 [file s1]

# Supplementary Materials: New Polyketides and New Benzoic Acid Derivatives from the Marine Sponge-Associated Fungus *Neosartorya quadricincta* KUFA 0081

Chadaporn Prompanya <sup>1,2</sup>, Tida Dethoup <sup>3</sup>, Luís Gales <sup>1,4</sup>, Michael Lee <sup>5</sup>, José A. C. Pereira <sup>1</sup>, Artur M. S. Silva <sup>6</sup>, Madalena M. M. Pinto <sup>2,7</sup>, Anake Kijjoa <sup>1,2,\*</sup>

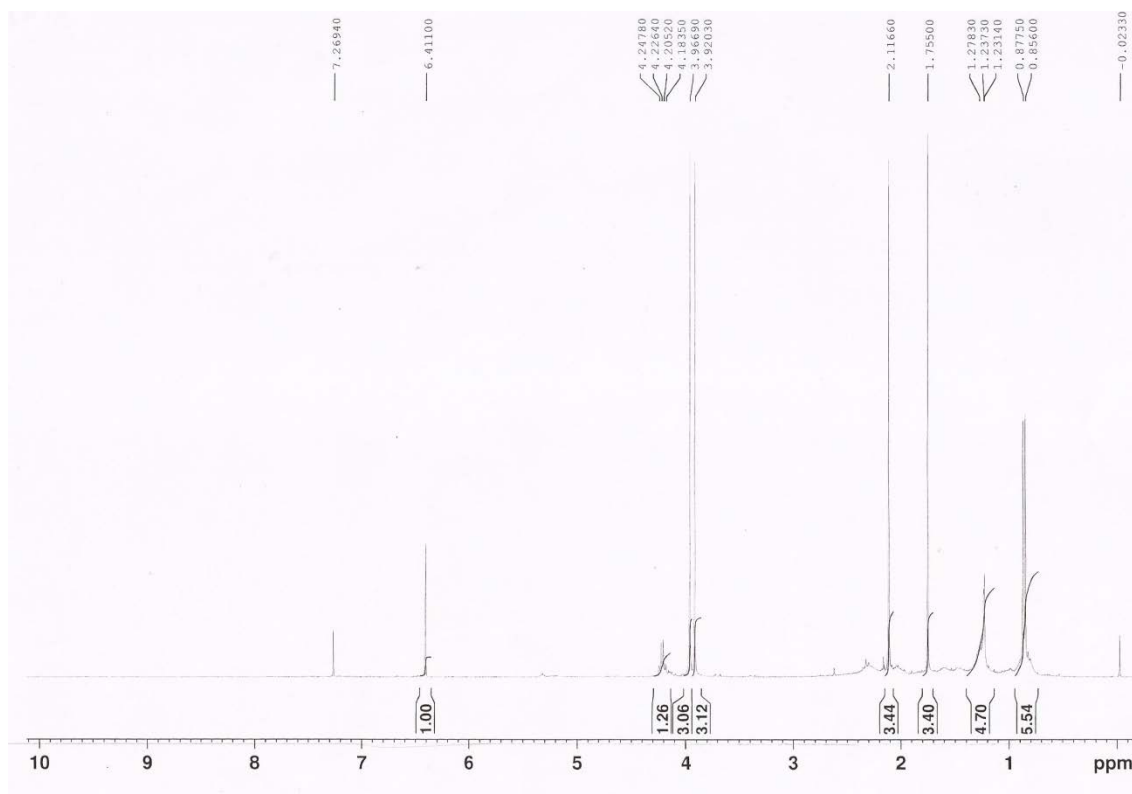

Figure S1. <sup>1</sup>H NMR spectrum of compound 1 (CDCl<sub>3</sub>, 300.13 MHz).

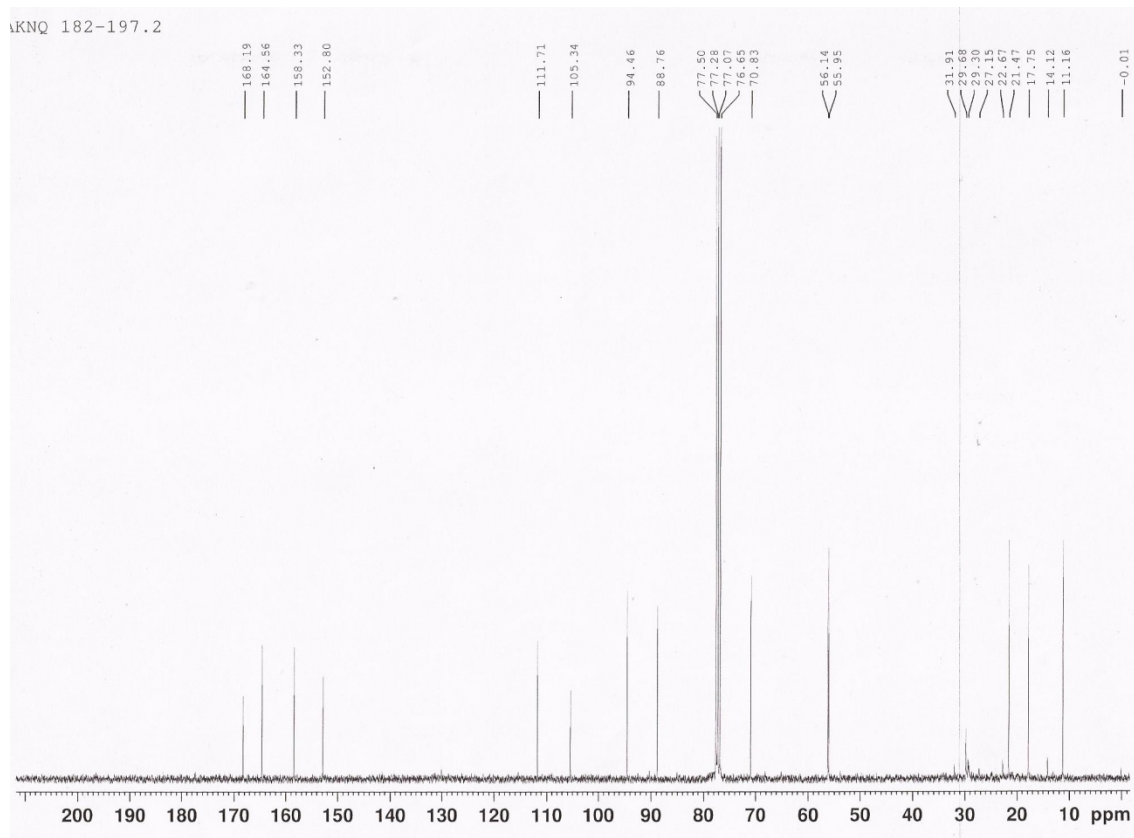

Figure S2. <sup>13</sup>C NMR spectrum of compound 1 (CDCl<sub>3</sub>, 75.47 MHz).

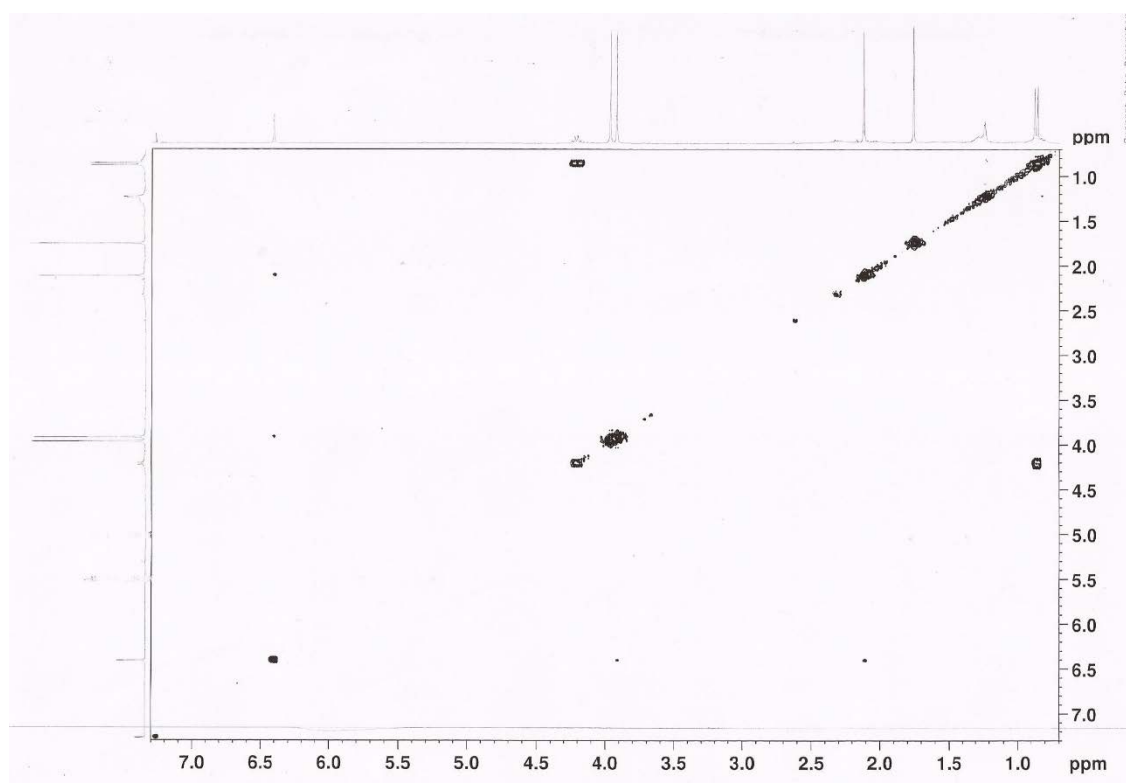

Figure S3. COSY spectrum of compound 1 (CDCl<sub>3</sub>, 300.13 MHz).

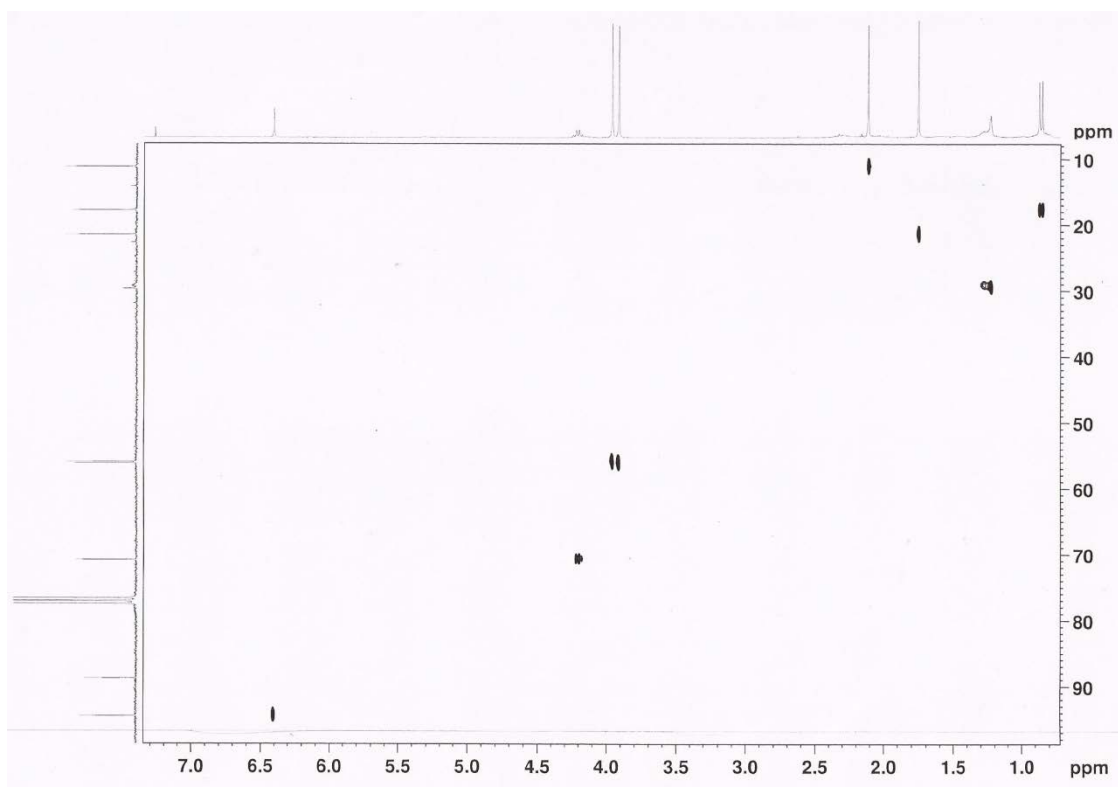

Figure S4. HSQC spectrum of compound **1** (CDCl<sub>3</sub>, 300.13 MHz).

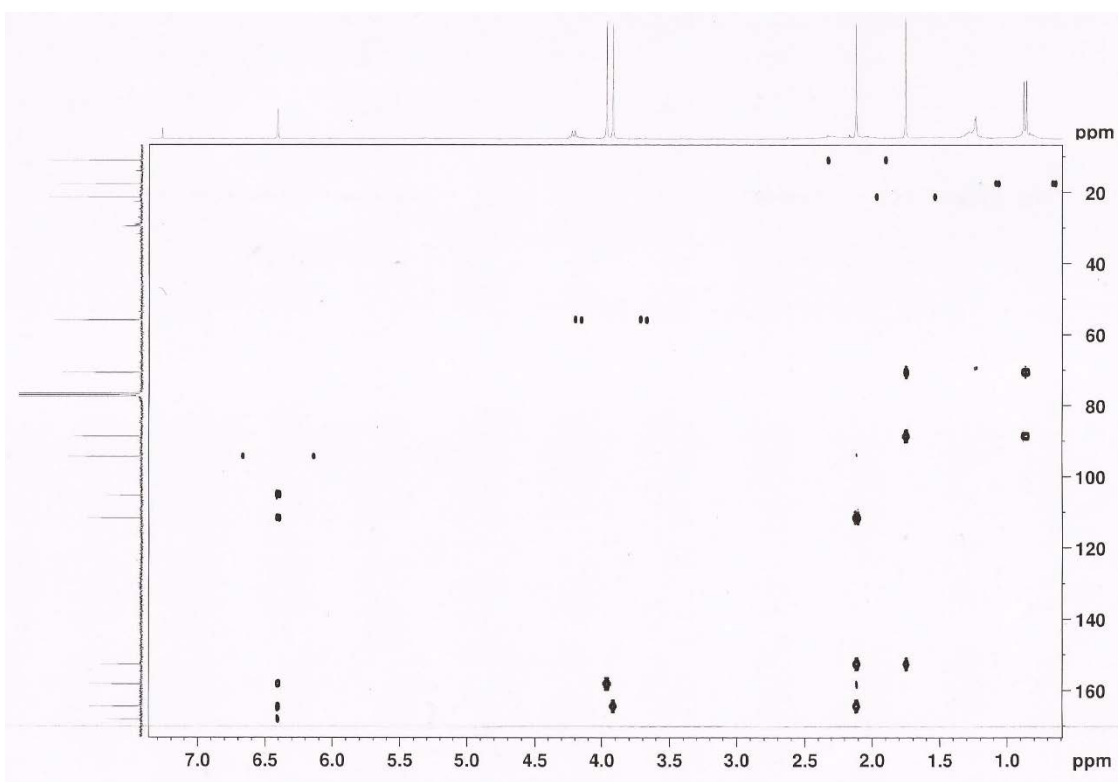

Figure S5. HMBC spectrum of compound **1** (CDCl<sub>3</sub>, 300.13 MHz).

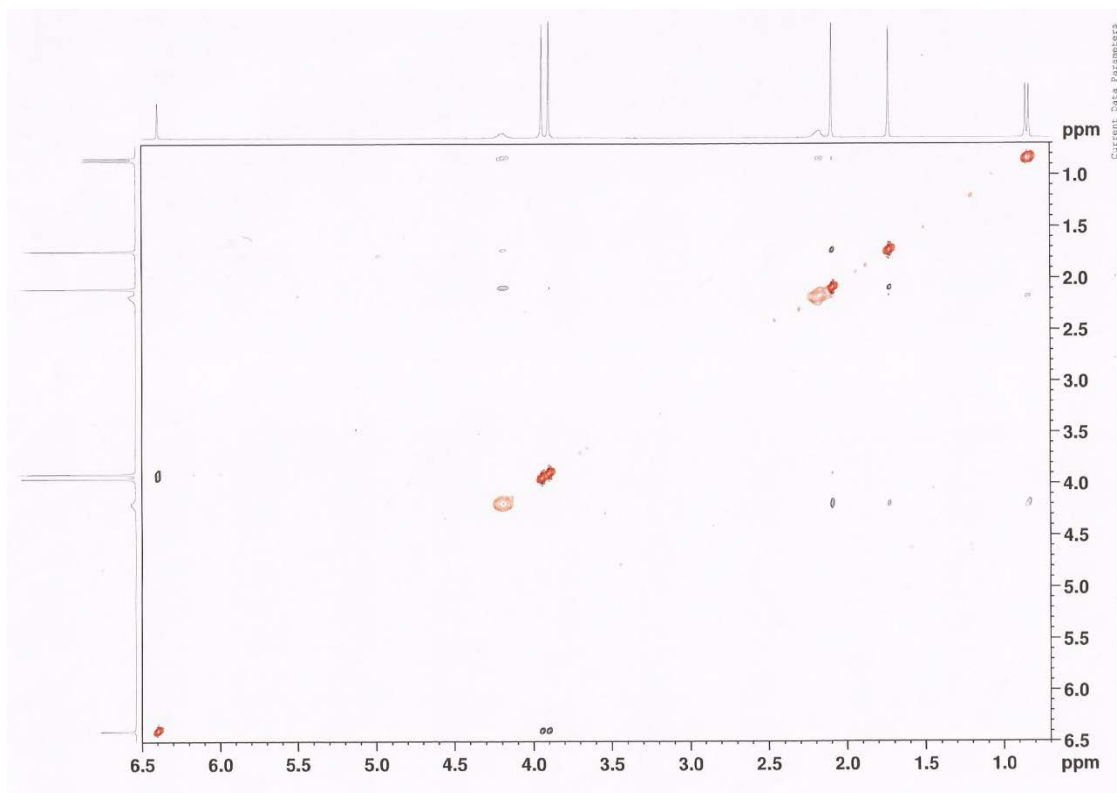

Figure S6. NOESY spectrum of compound 1 (CDCl<sub>3</sub>, 300.13 MHz).

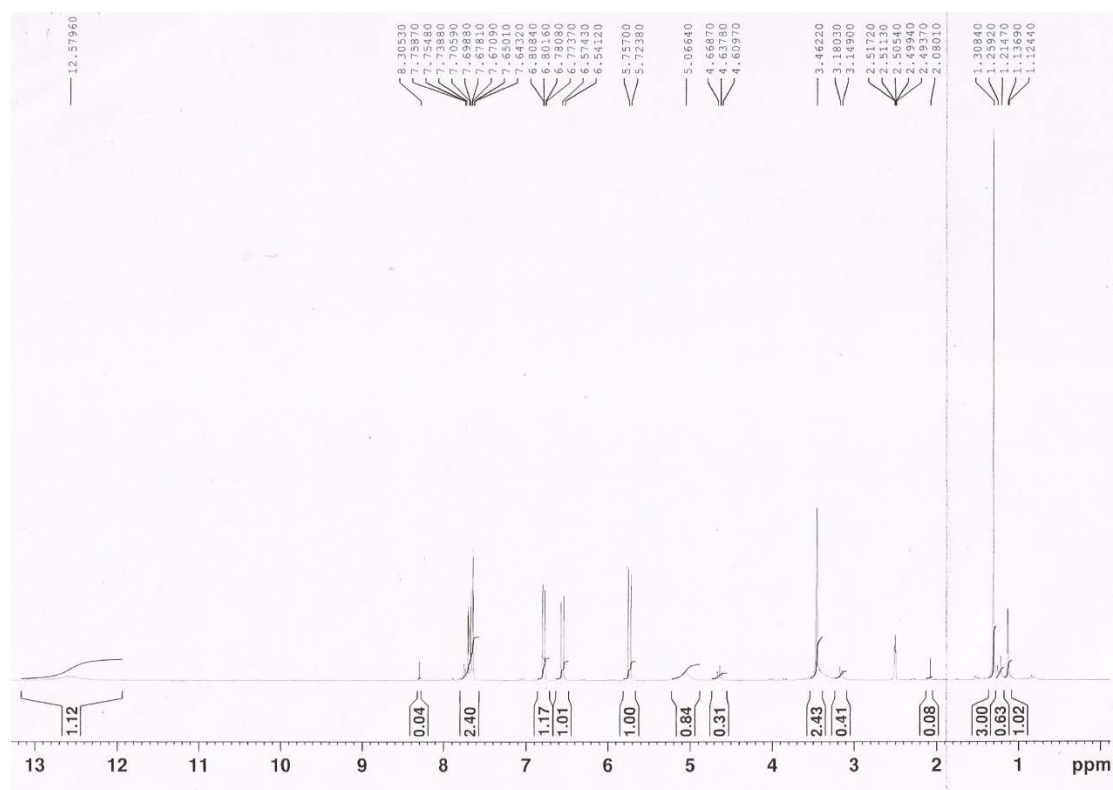

Figure S7. <sup>1</sup>H NMR spectrum of compound 2a (DMSO, 300.13 MHz).

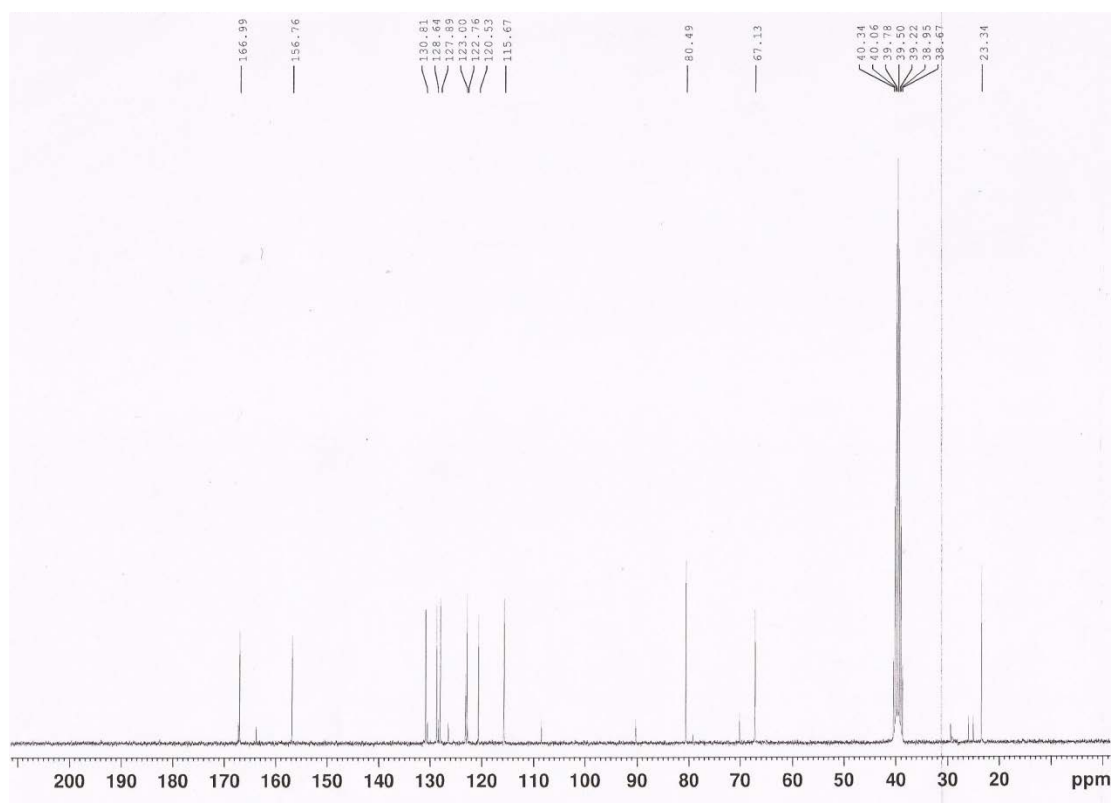

**Figure S8.** <sup>13</sup>C NMR spectrum of compound **2a** (DMSO, 75.4 MHz).

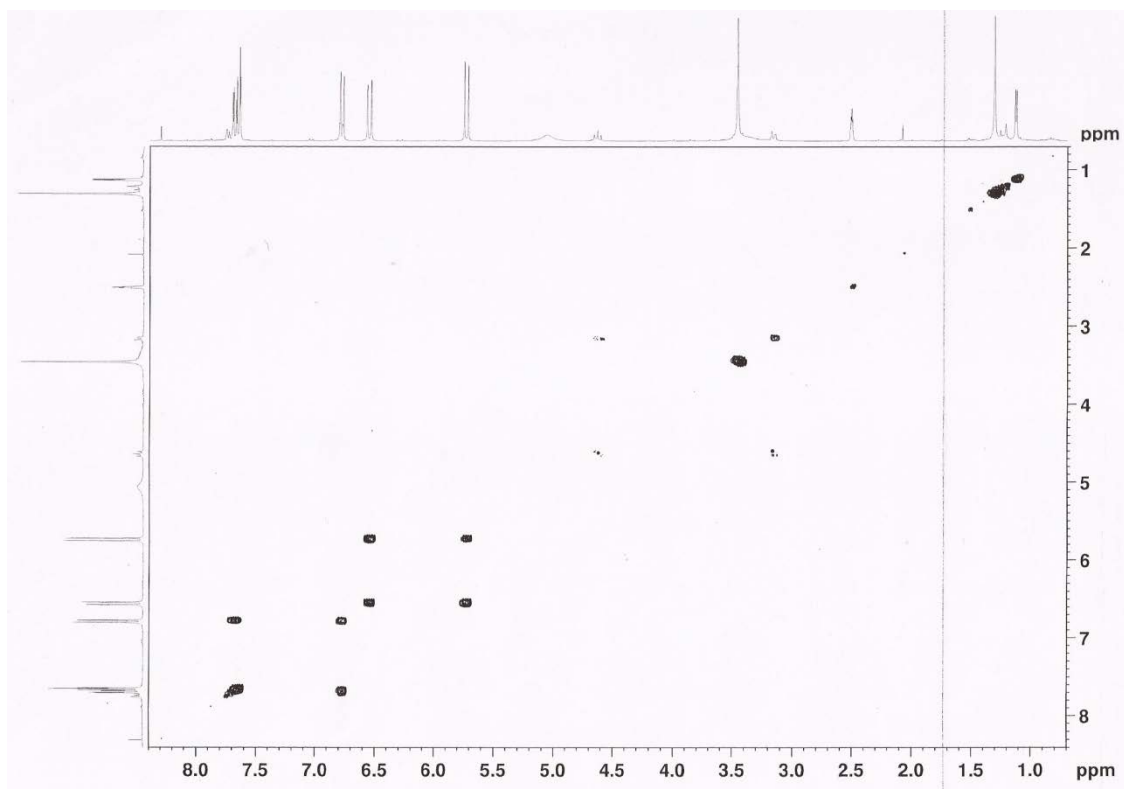

**Figure S9.** COSY spectrum of compound **2a** (DMSO, 300.13 MHz).

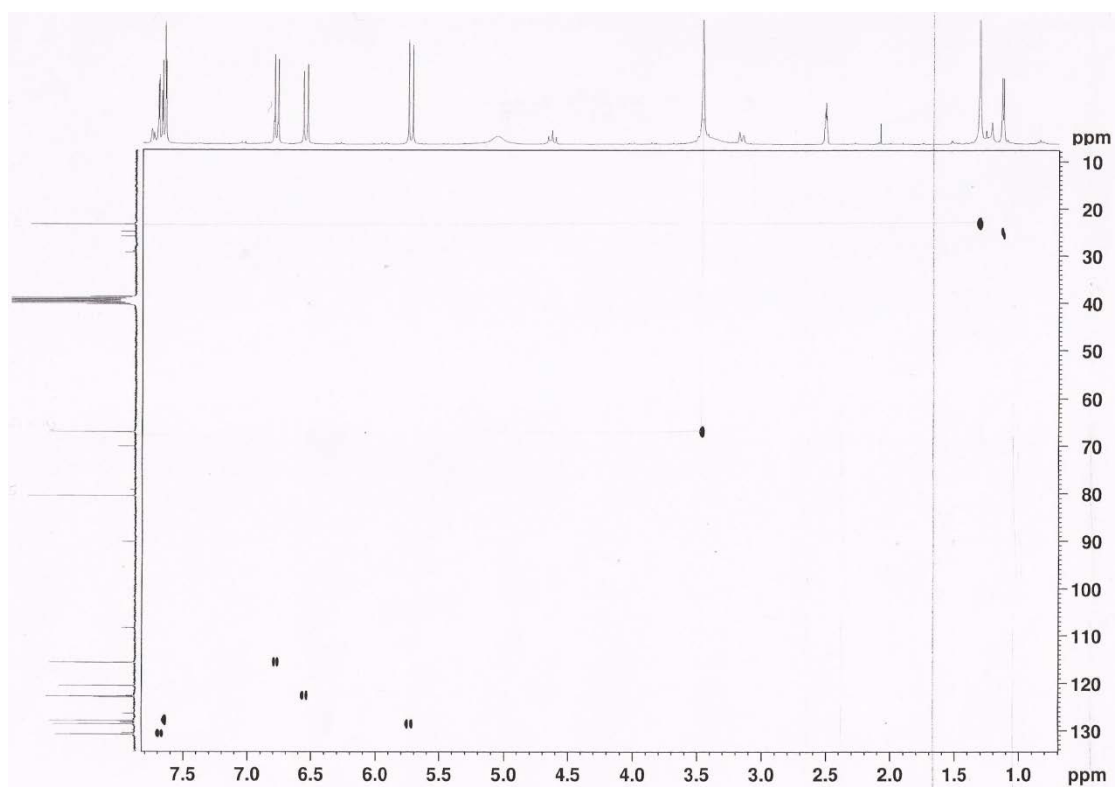

Figure S10. HSQC spectrum of compound 2a (DMSO, 300.13 MHz).

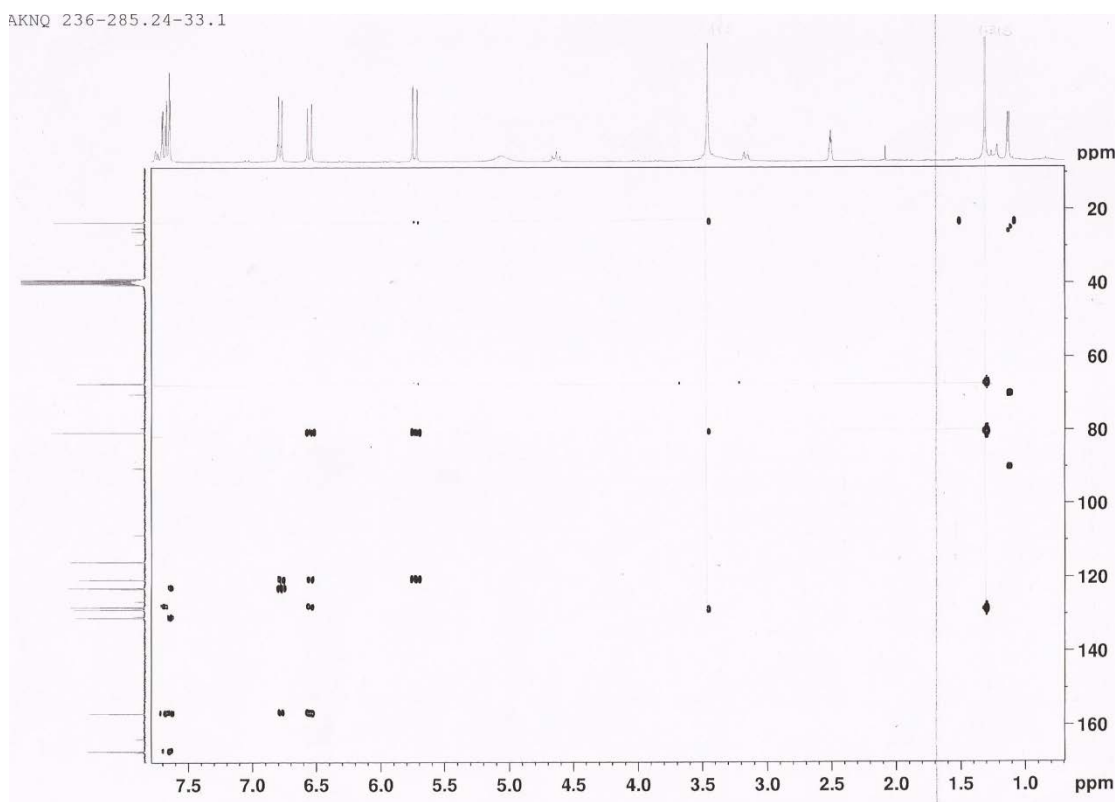

Figure S11. HMBC spectrum of compound 2a (DMSO, 300.13 MHz).

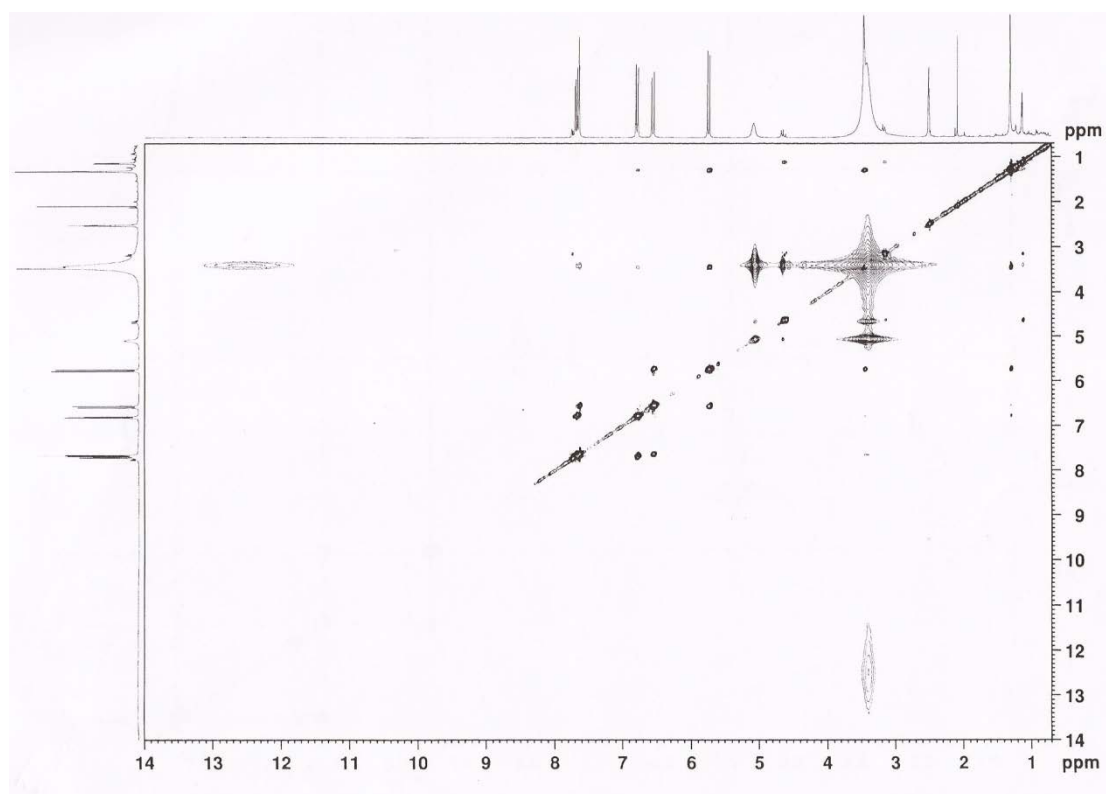

Figure S12. NOESY spectrum of compound **2a** (DMSO, 300.13 MHz).

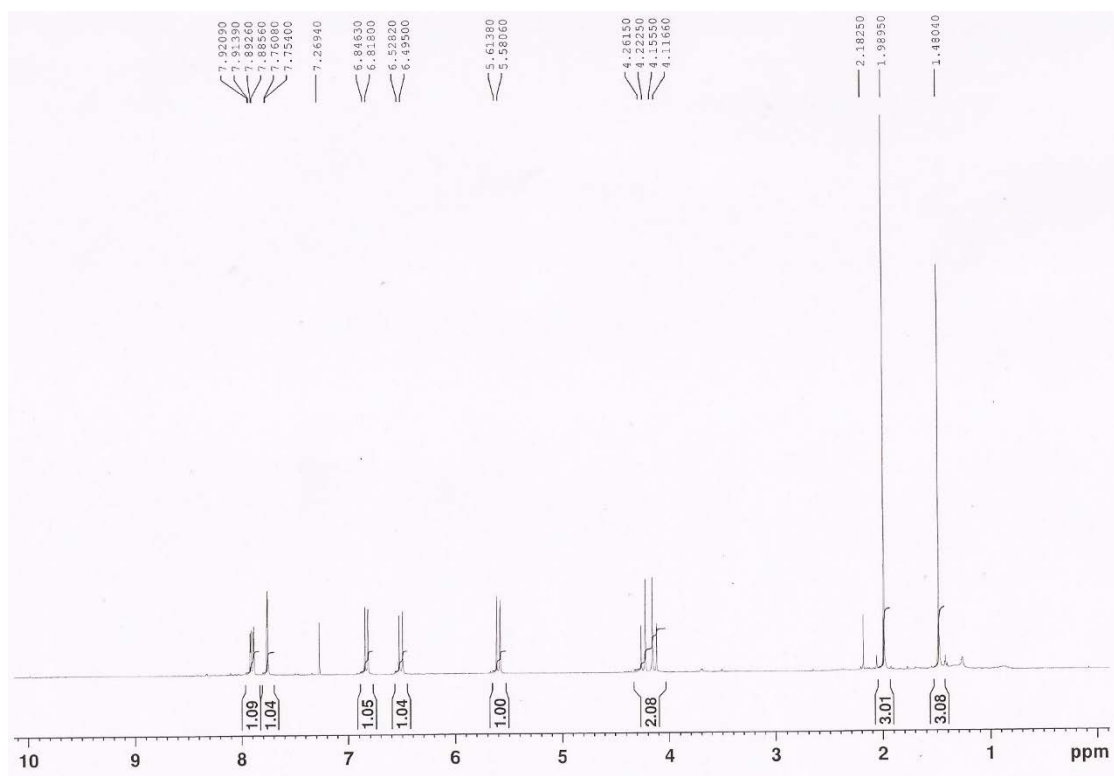

Figure S13.  $^1\text{H}$  NMR spectrum of compound **2b** (DMSO, 300.13 MHz).

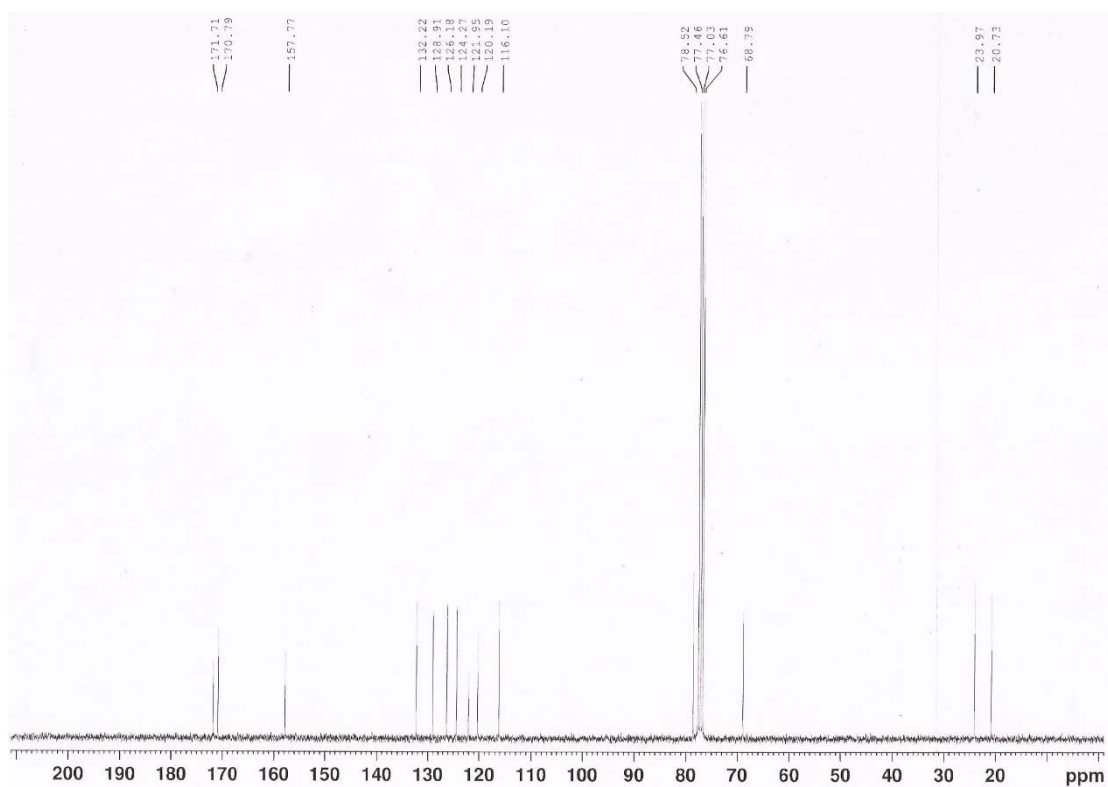

Figure S14. <sup>13</sup>C NMR spectrum of compound **2a** (DMSO, 75.4 MHz).

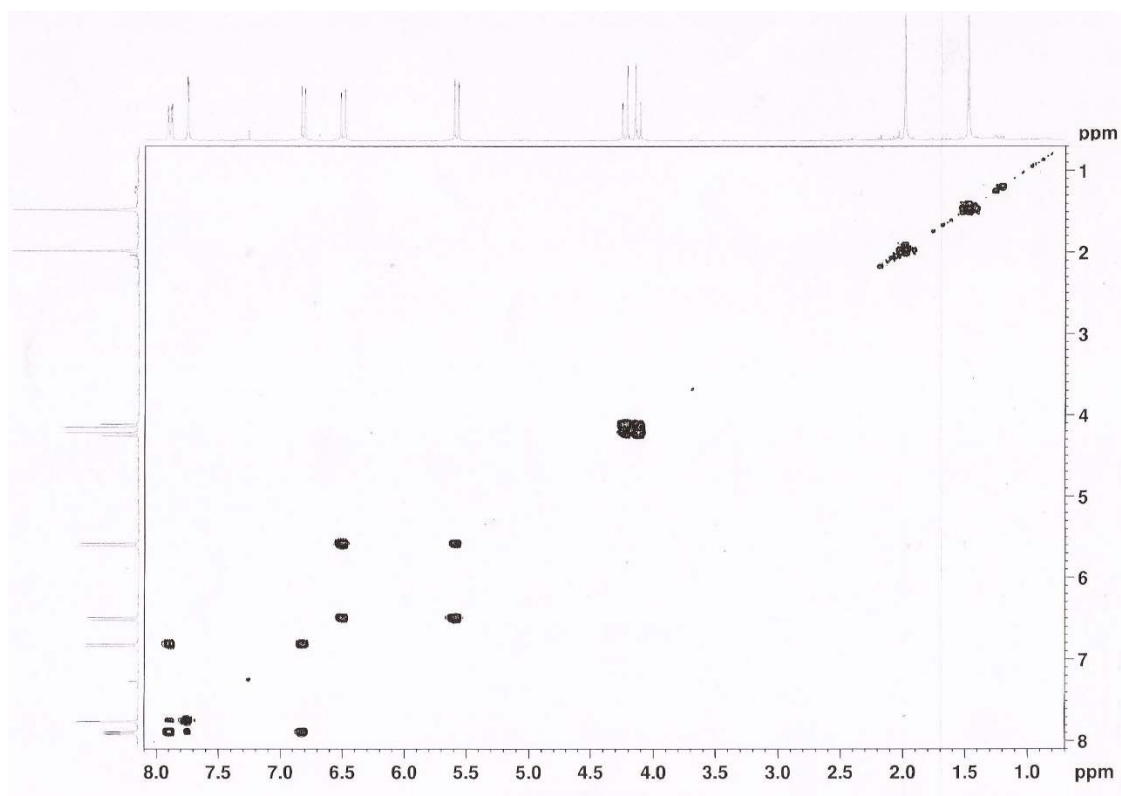

Figure S15. COSY spectrum of compound **2b** (DMSO, 300.13 MHz).



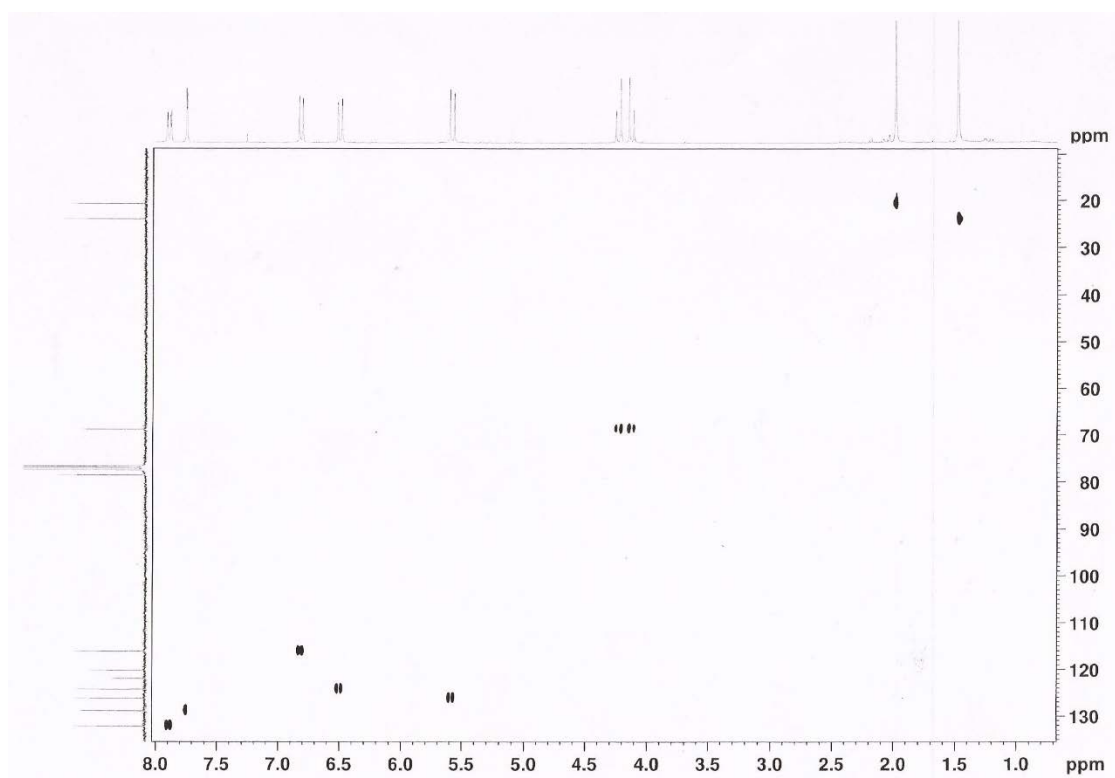

Figure S16. HSQC spectrum of compound **2b** (DMSO, 300.13 MHz).

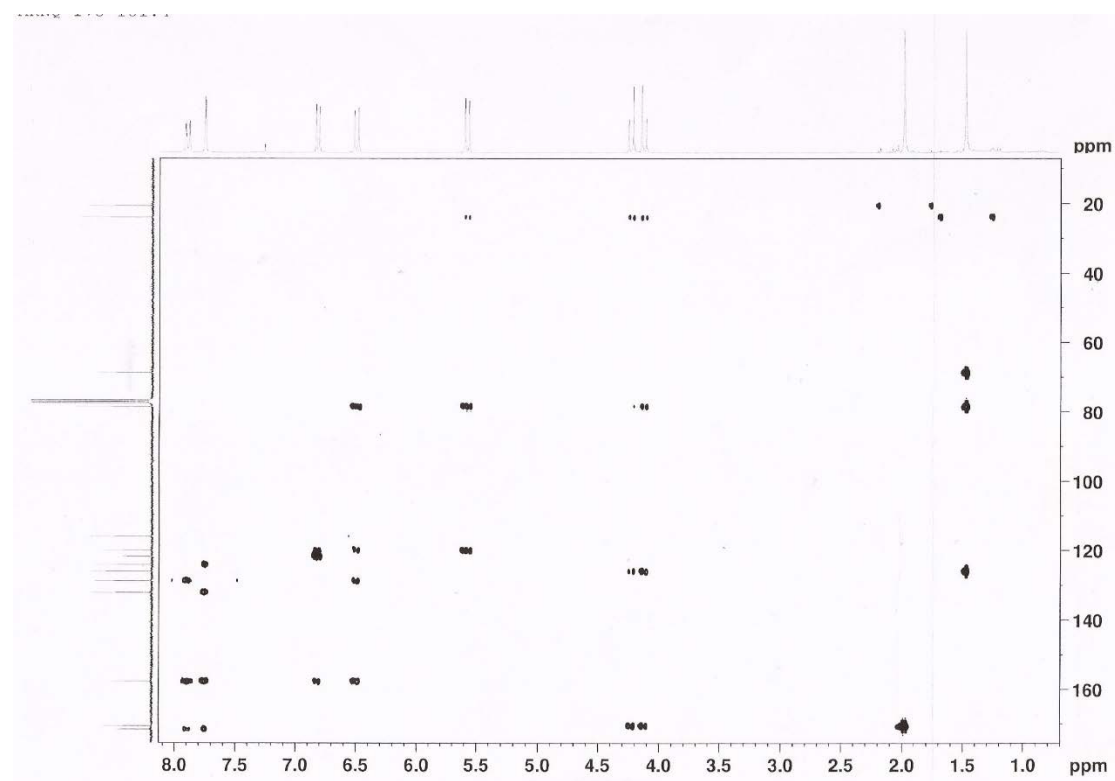

Figure S17. HMBC spectrum of compound **2b** (DMSO, 300.13 MHz).

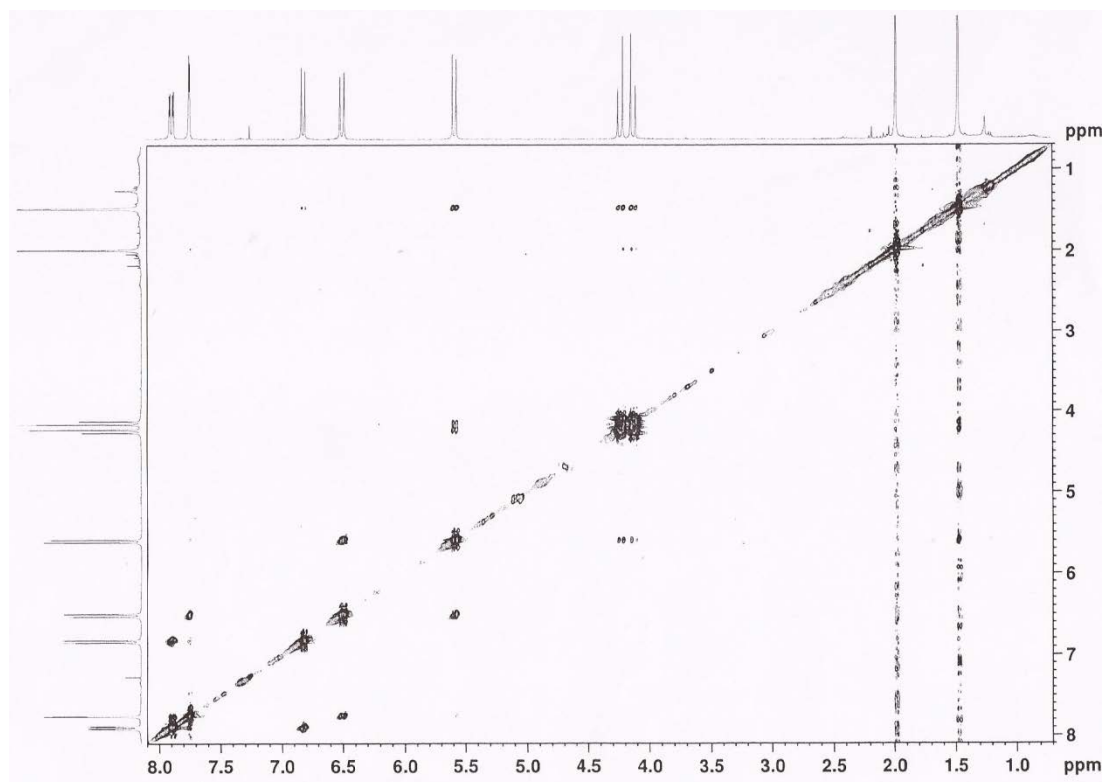

Figure S18. NOESY spectrum of compound **2b** (DMSO, 300.13 MHz).

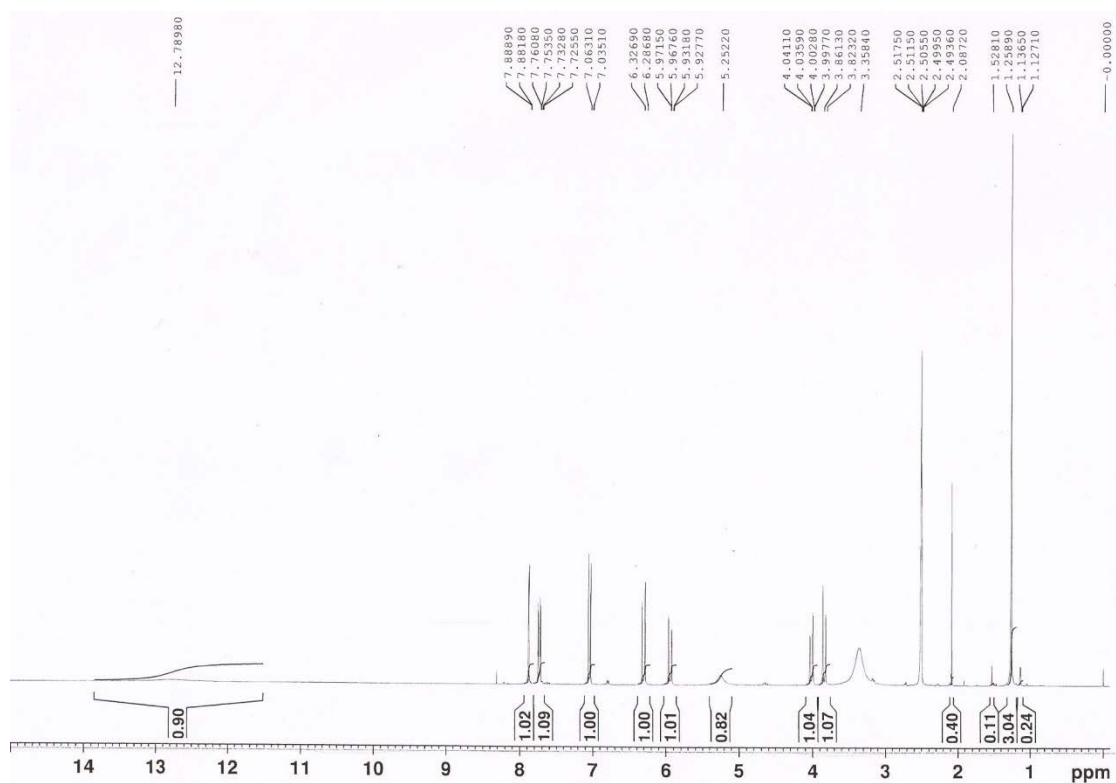

Figure S19.  $^1\text{H}$  NMR spectrum of compound **3** (DMSO, 300.13 MHz).

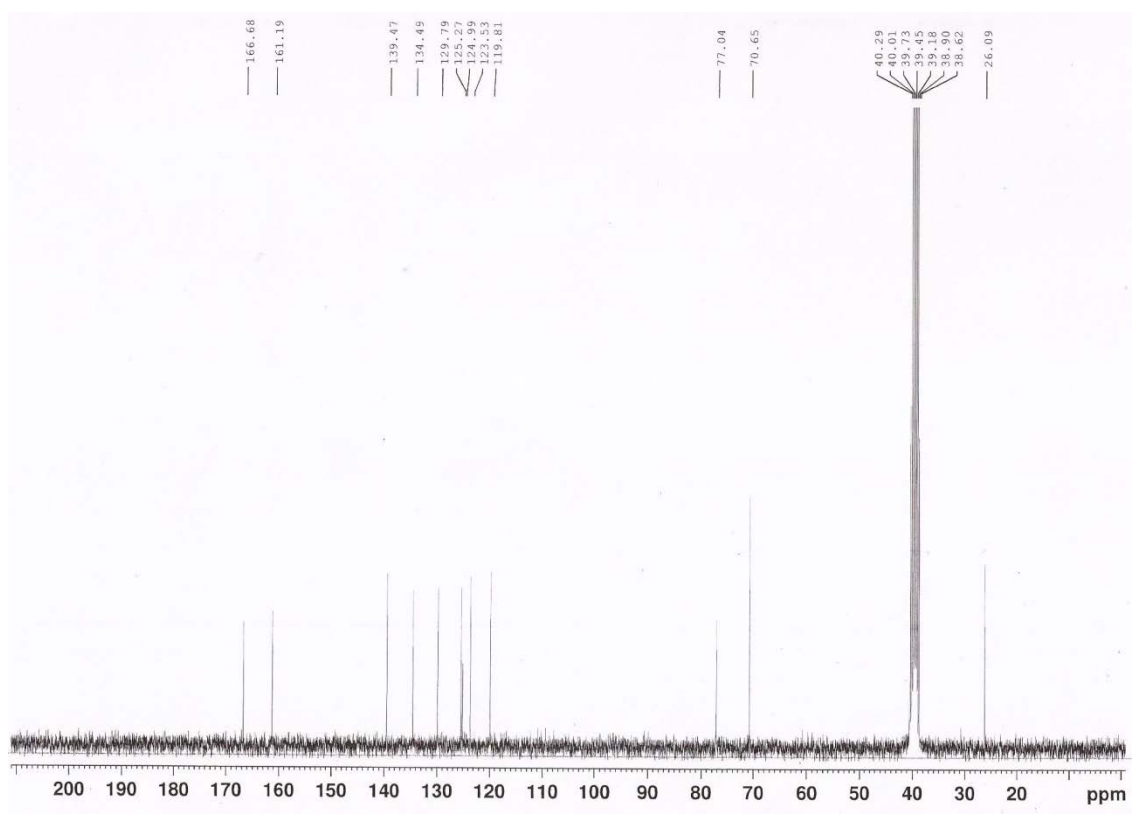

Figure S20. <sup>13</sup>C NMR spectrum of compound 3 (DMSO, 75.4 MHz).

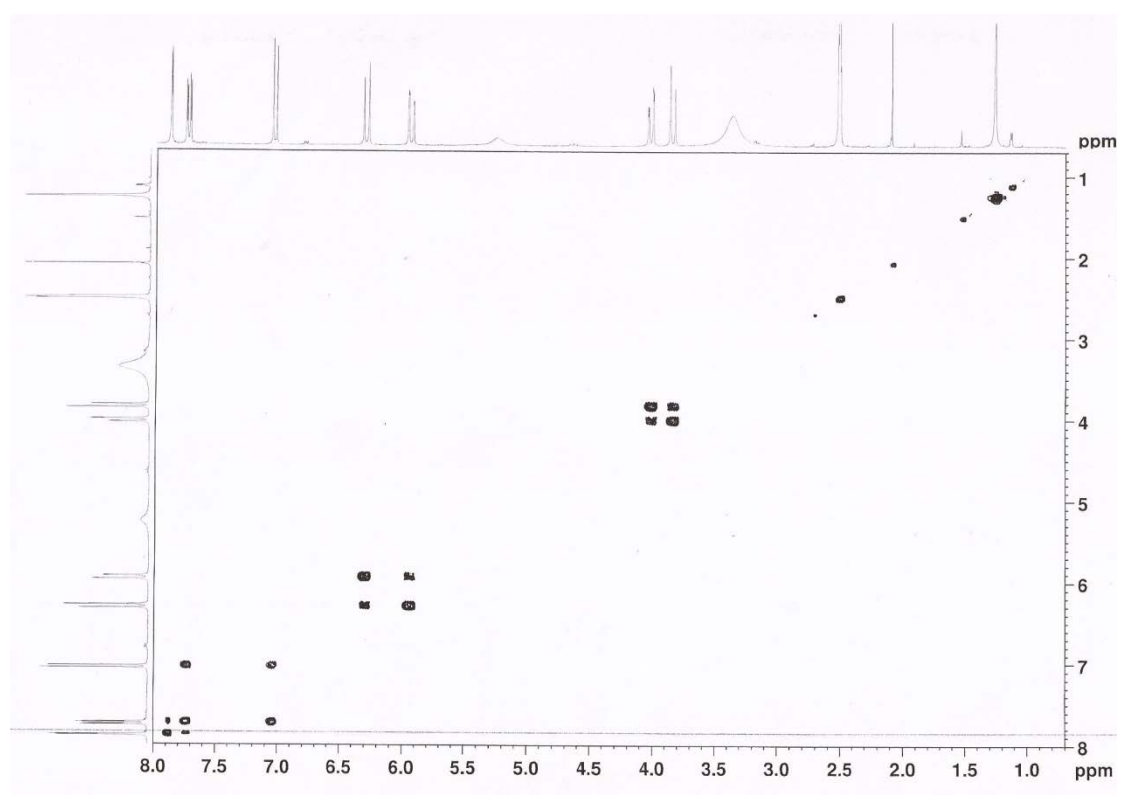

Figure S21. COSY spectrum of compound 3 (DMSO, 300.13 MHz).

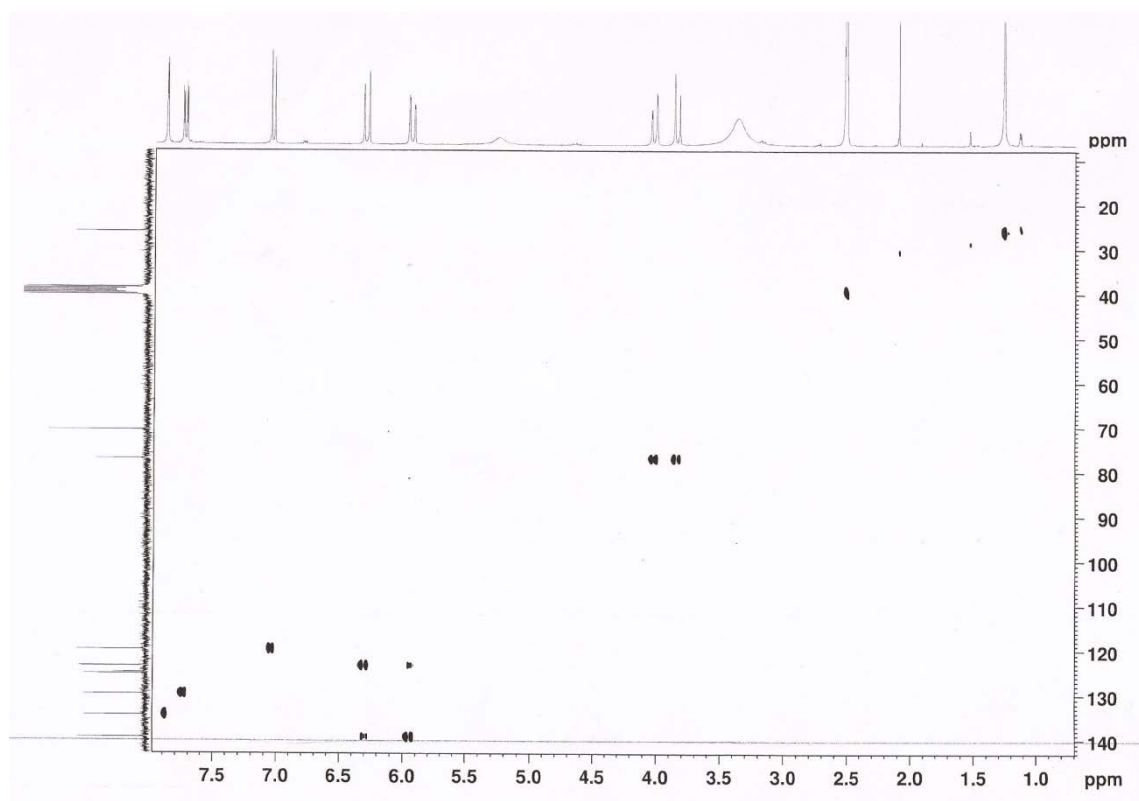

Figure S22. HSQC spectrum of compound 3 (DMSO, 300.13 MHz).

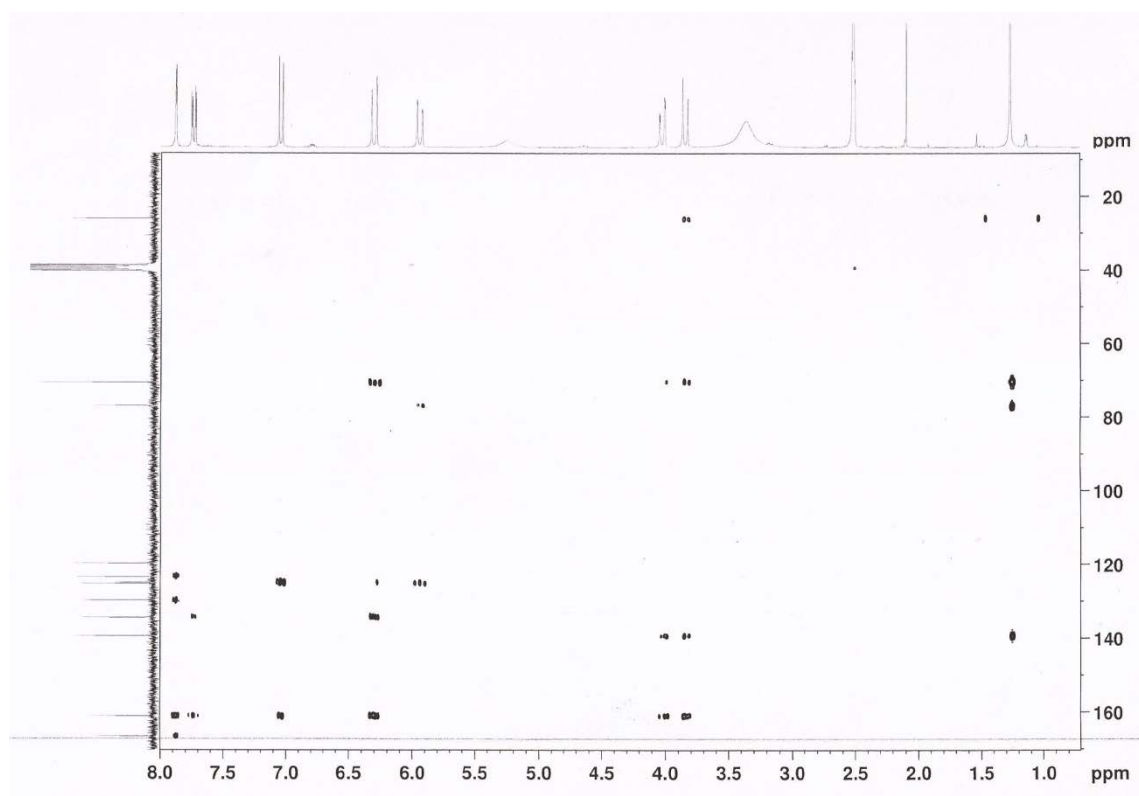

Figure S23. HMBC spectrum of compound 3 (DMSO, 300.13 MHz).

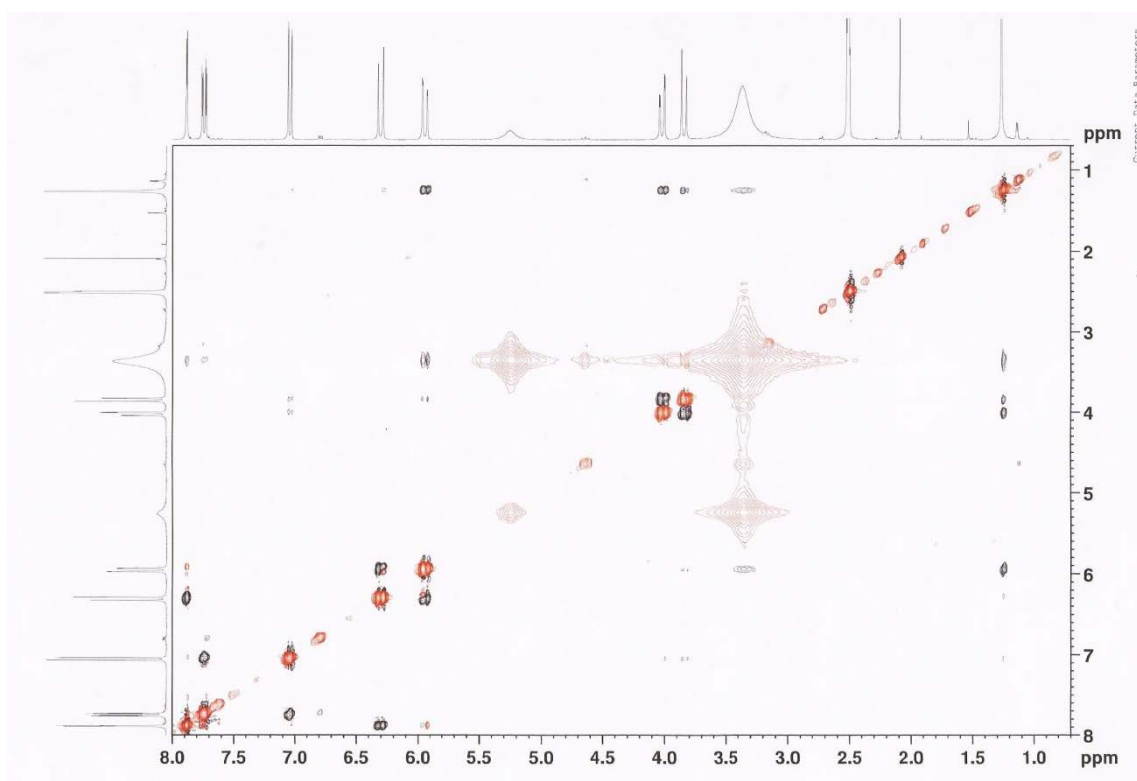

Figure S24. NOESY spectrum of compound **3** (DMSO, 300.13 MHz).

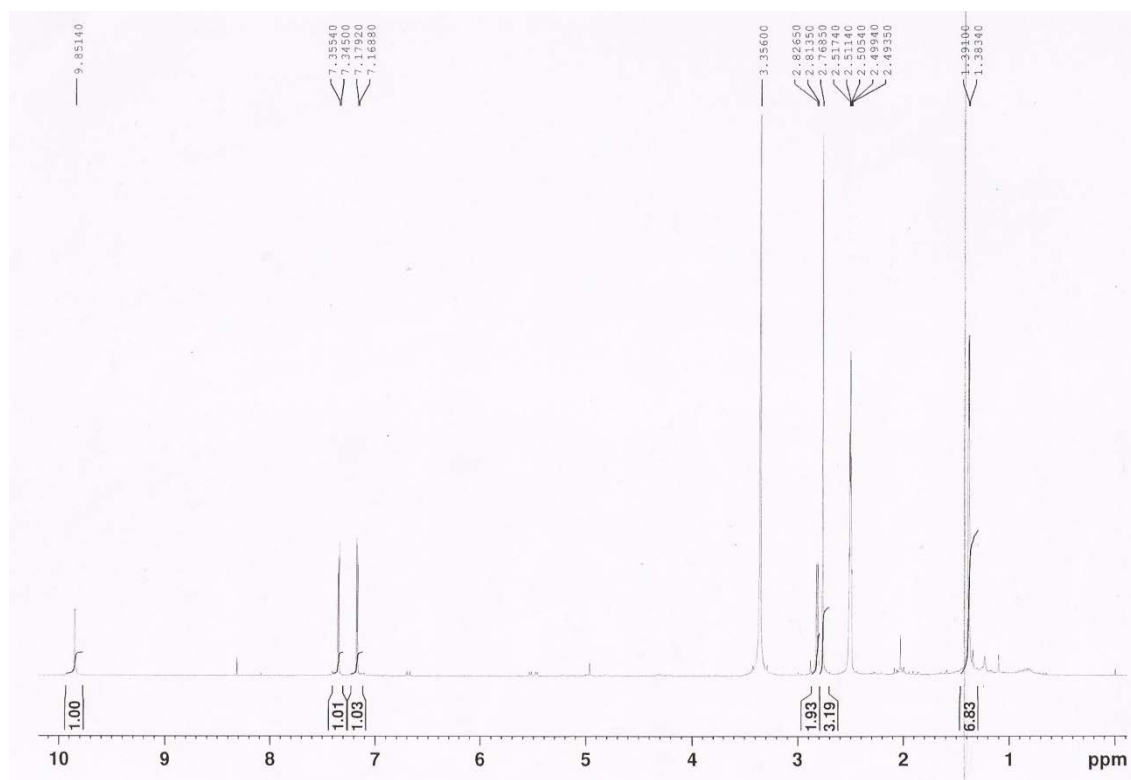

Figure S25.  $^1\text{H}$  NMR spectrum of compound **4b** (DMSO, 300.13 MHz).

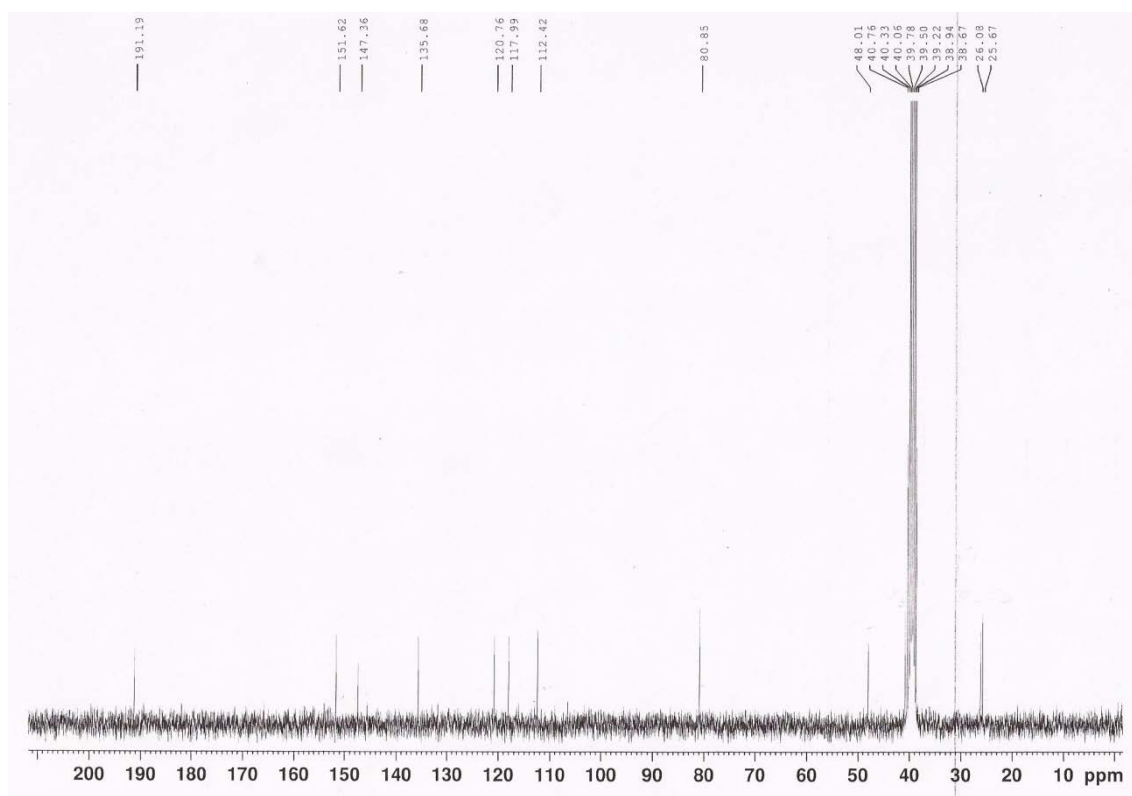

Figure S26. <sup>13</sup>C NMR spectrum of compound **4b** (DMSO, 75.4 MHz).

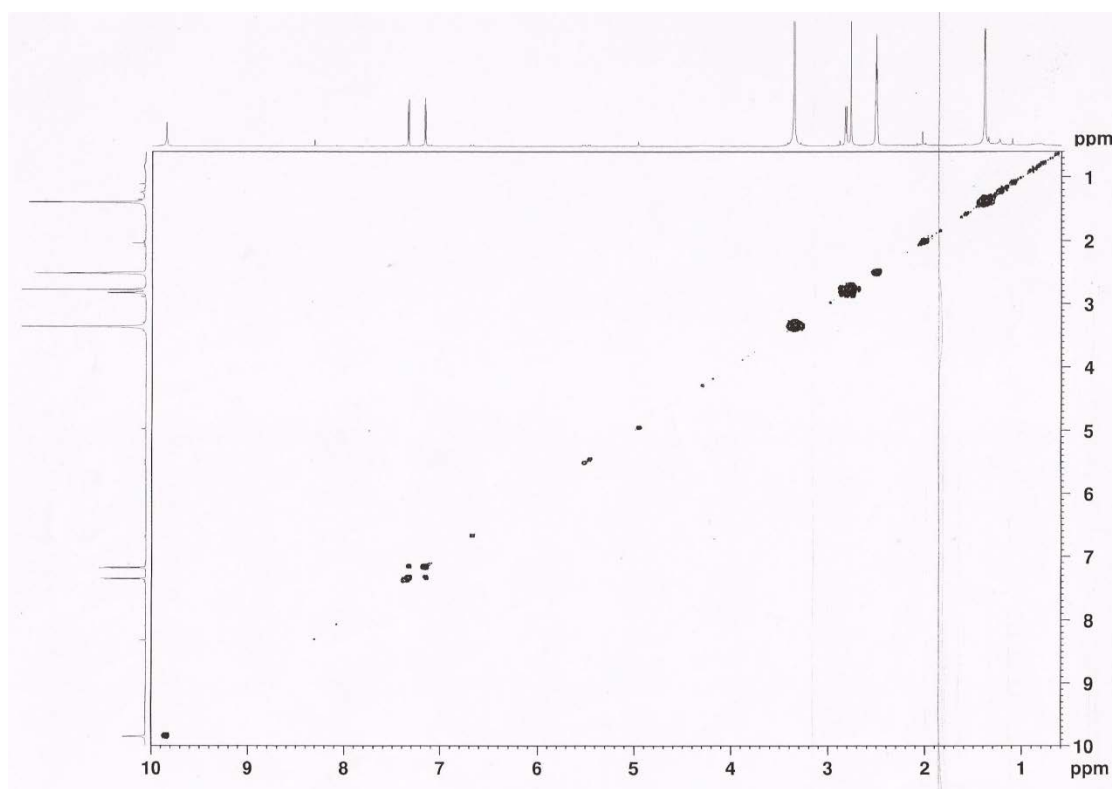

Figure S27. COSY spectrum of compound **4b** (DMSO, 300.13 MHz).

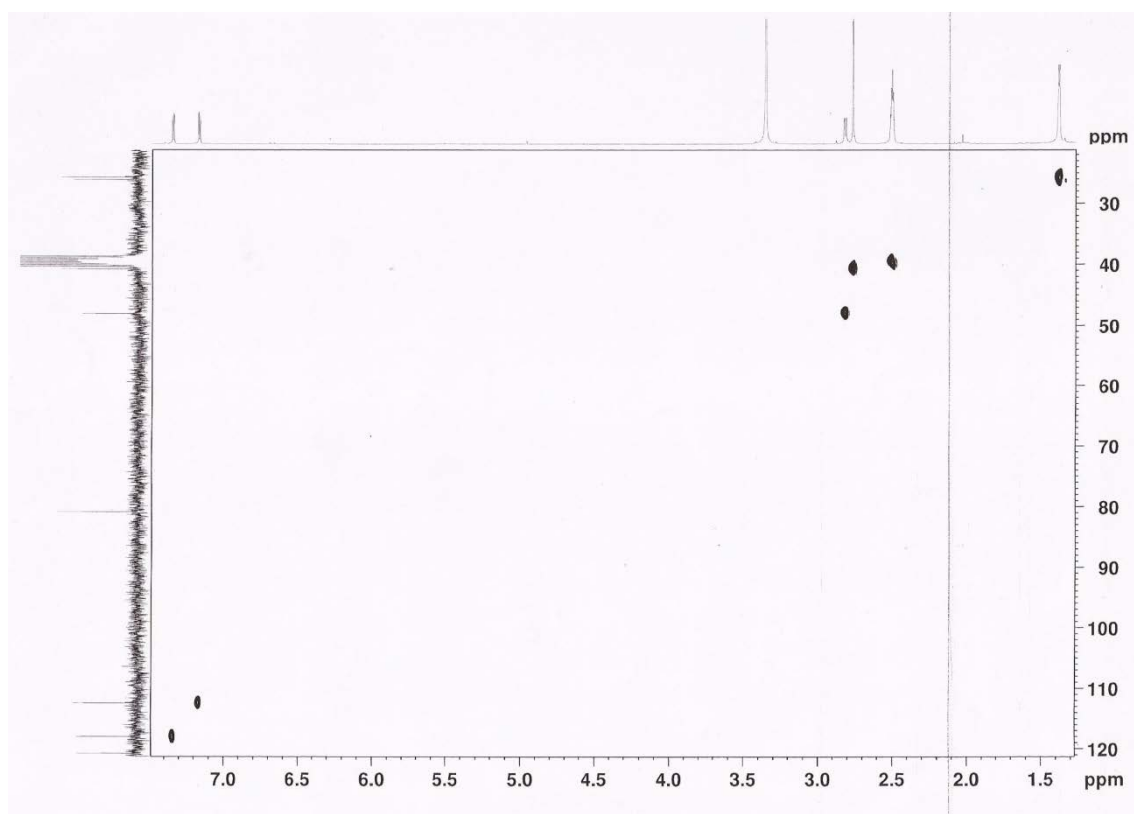

Figure S28. HSQC spectrum of compound **4b** (DMSO, 300.13 MHz).

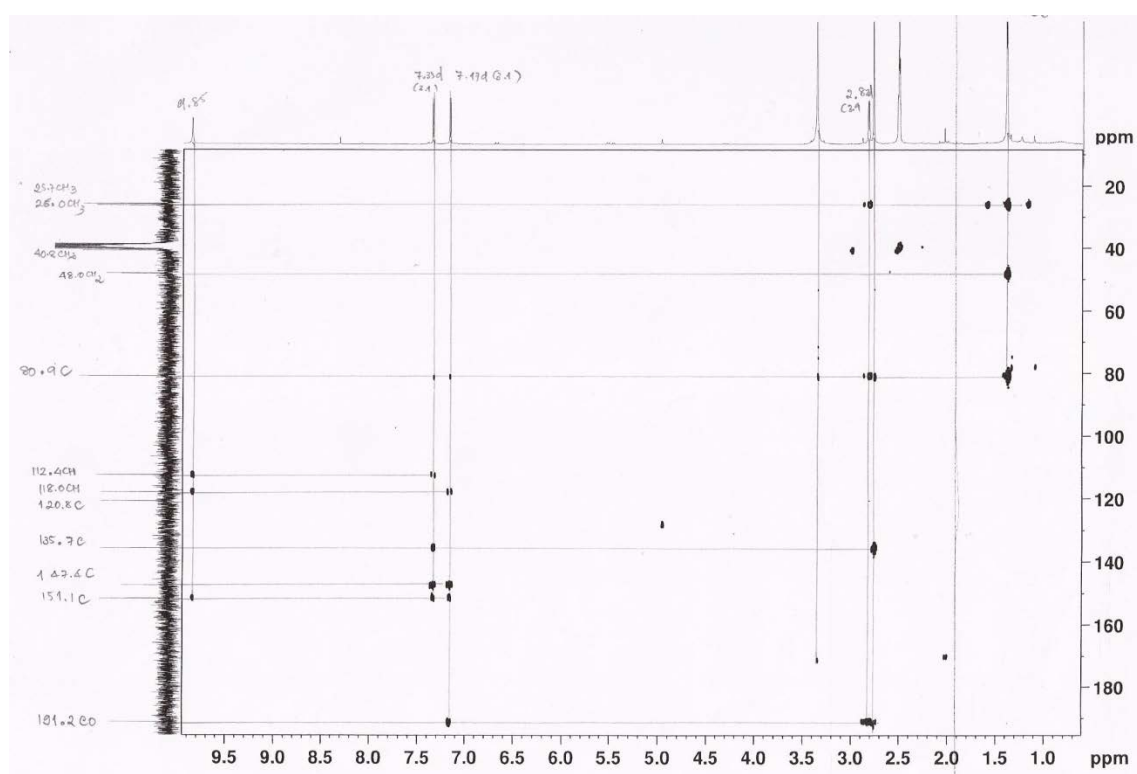

Figure S29. HMBC spectrum of compound **4b** (DMSO, 300.13 MHz).

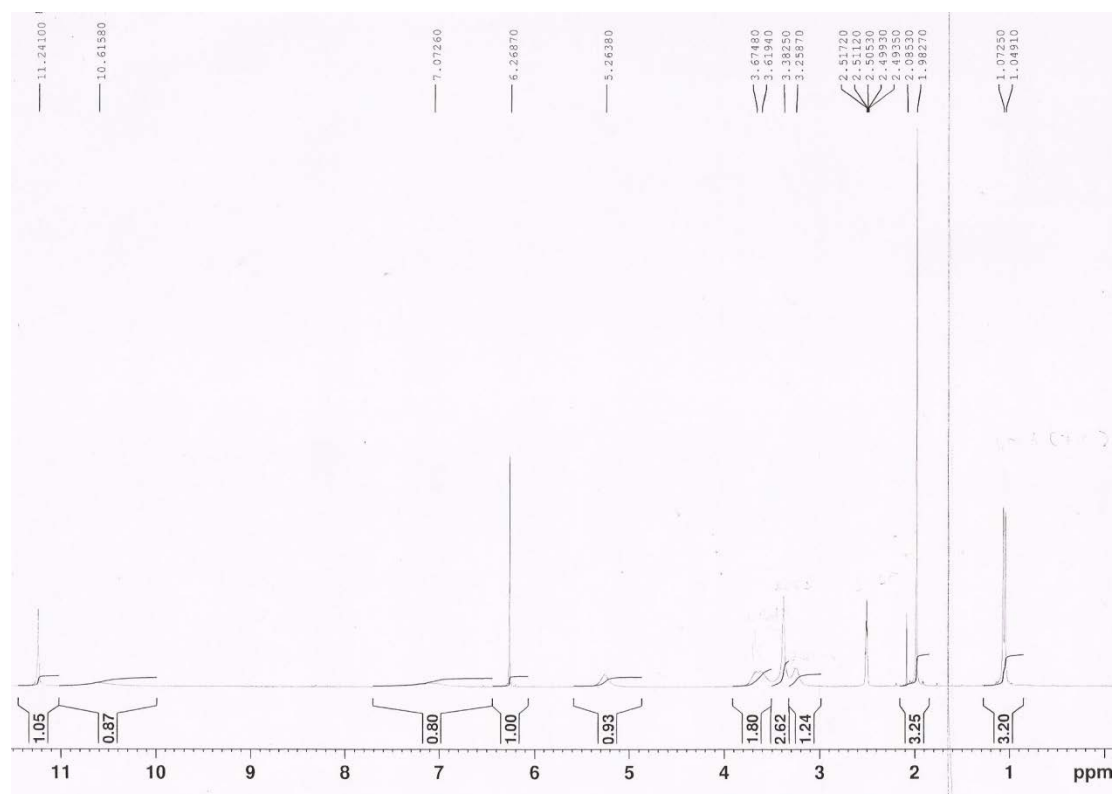

Figure S30. <sup>1</sup>H spectrum of compound 5 (DMSO, 300.13 MHz).

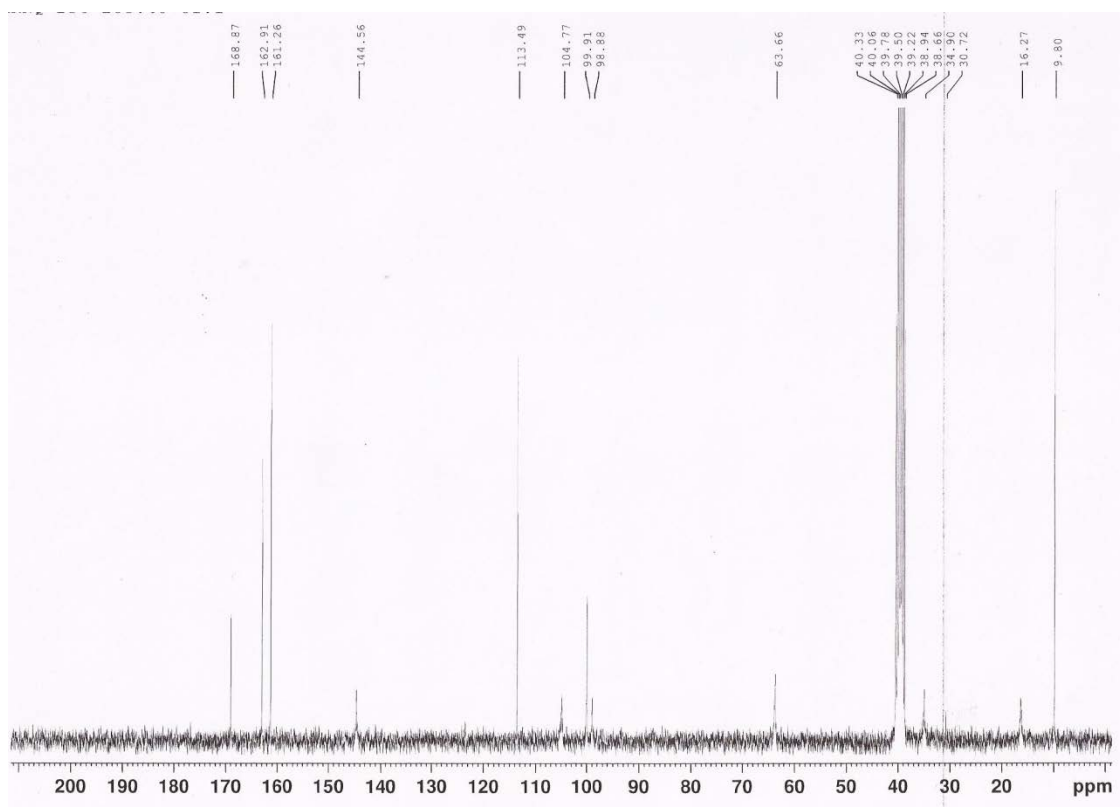

Figure S31. <sup>13</sup>C spectrum of compound 5 (DMSO, 75.4 MHz).



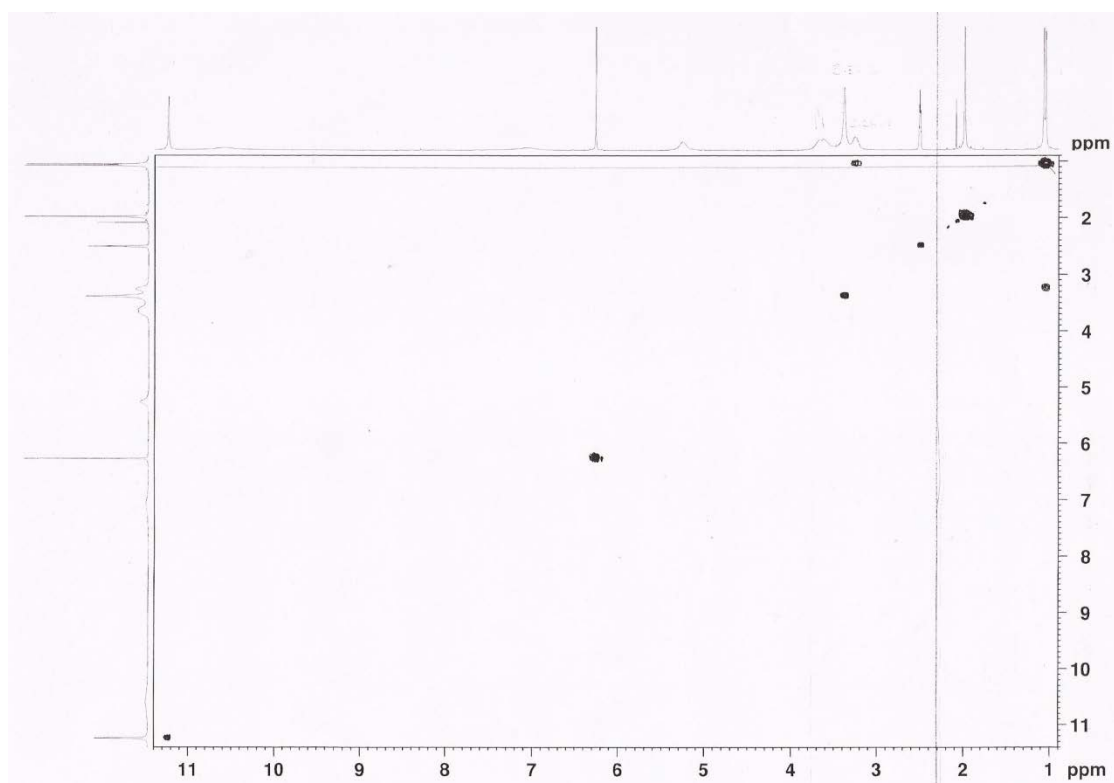

**Figure S32.** COSY spectrum of compound **5** (DMSO, 300.13 MHz).

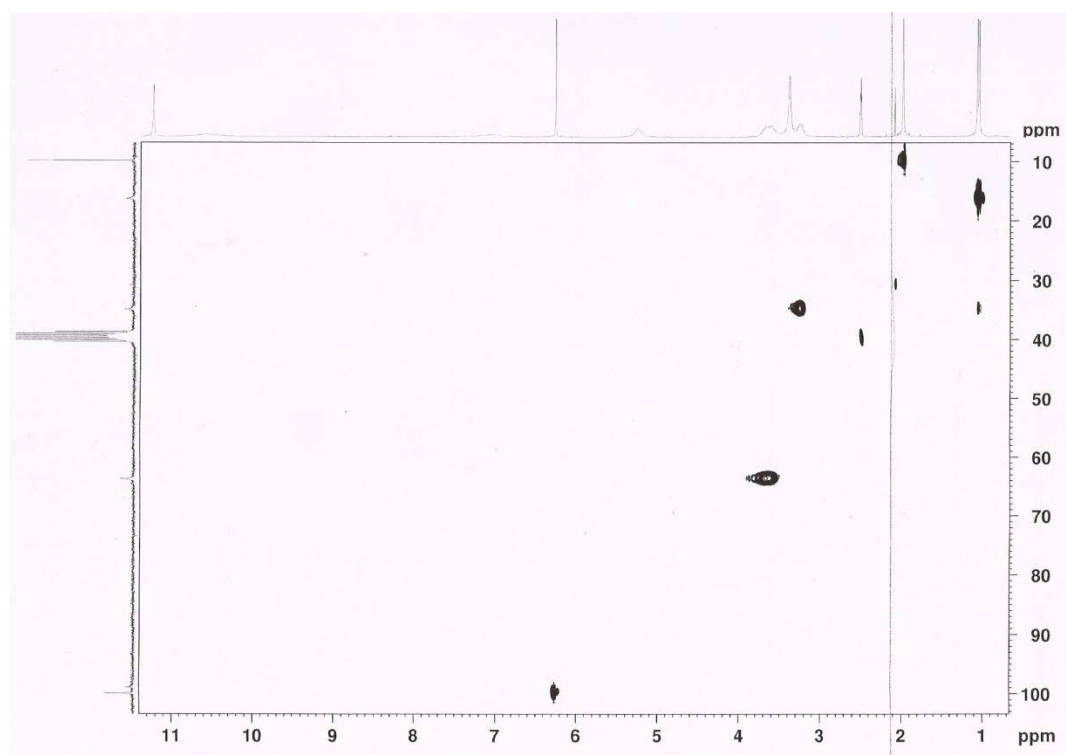

**Figure S33.** HSQC spectrum of compound **5** (DMSO, 300.13 MHz).

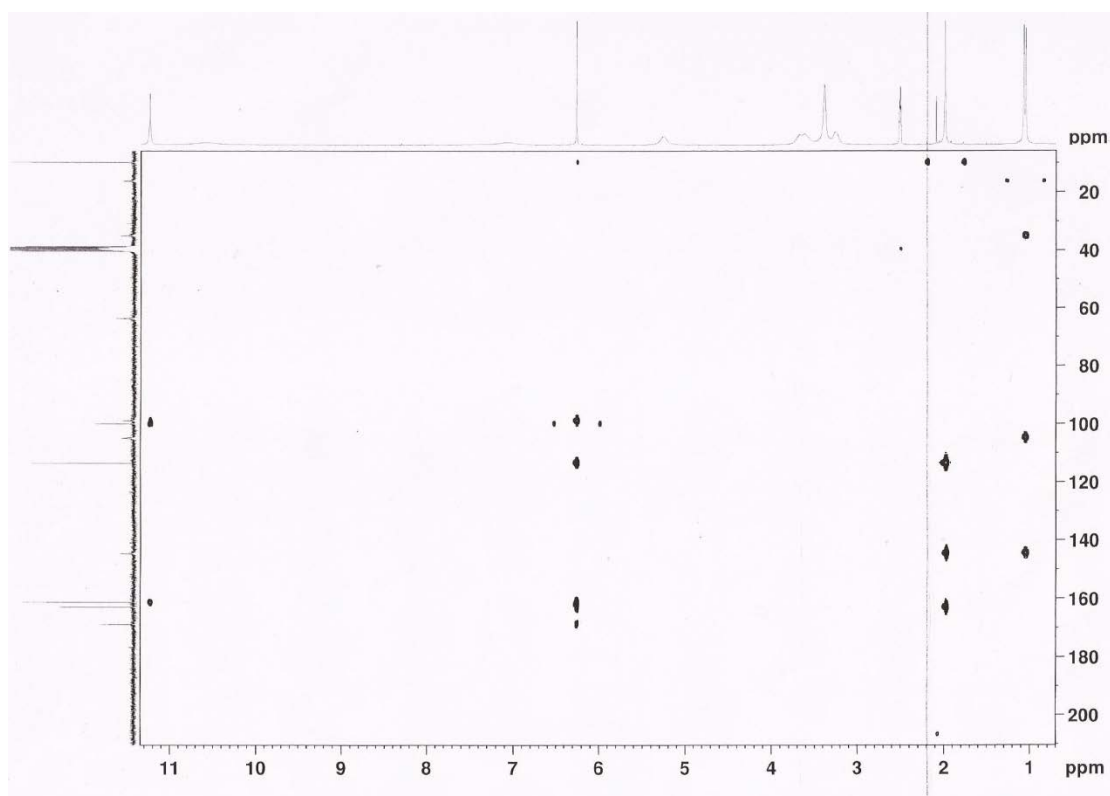

Figure S34. HMBC spectrum of compound 5 (DMSO, 300.13 MHz).

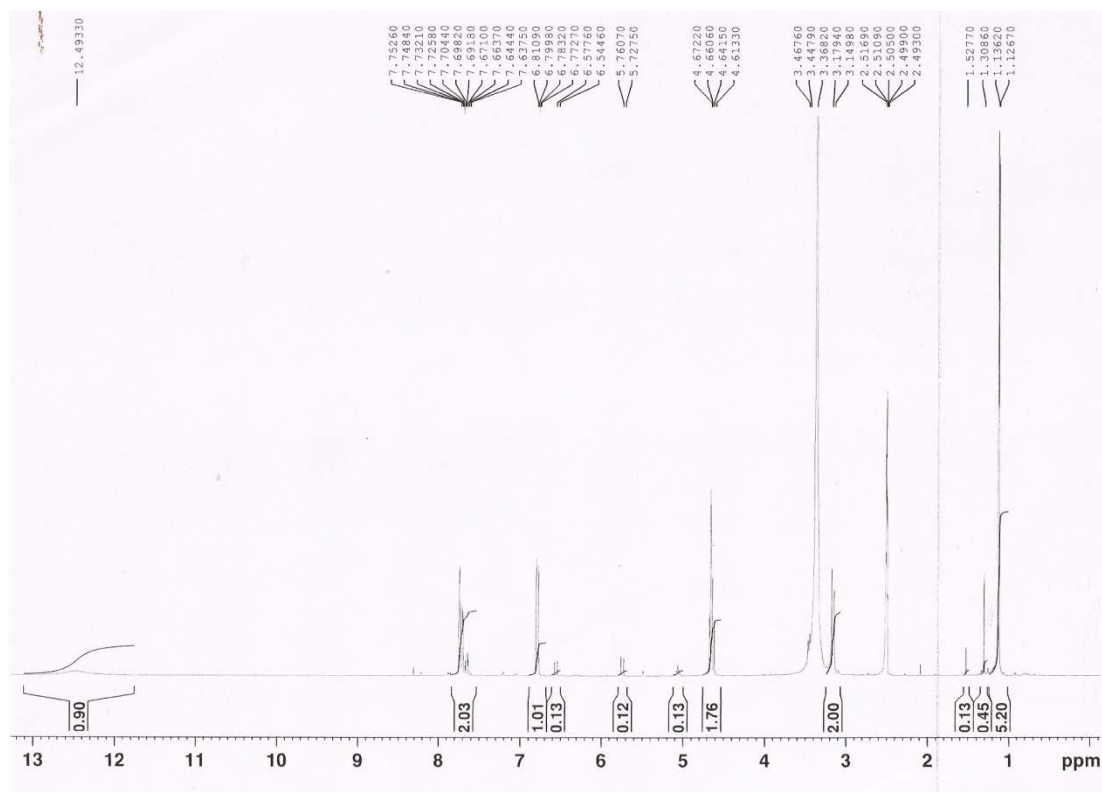

Figure S35.  $^1\text{H}$  spectrum of compound 6a (DMSO, 300.13 MHz).

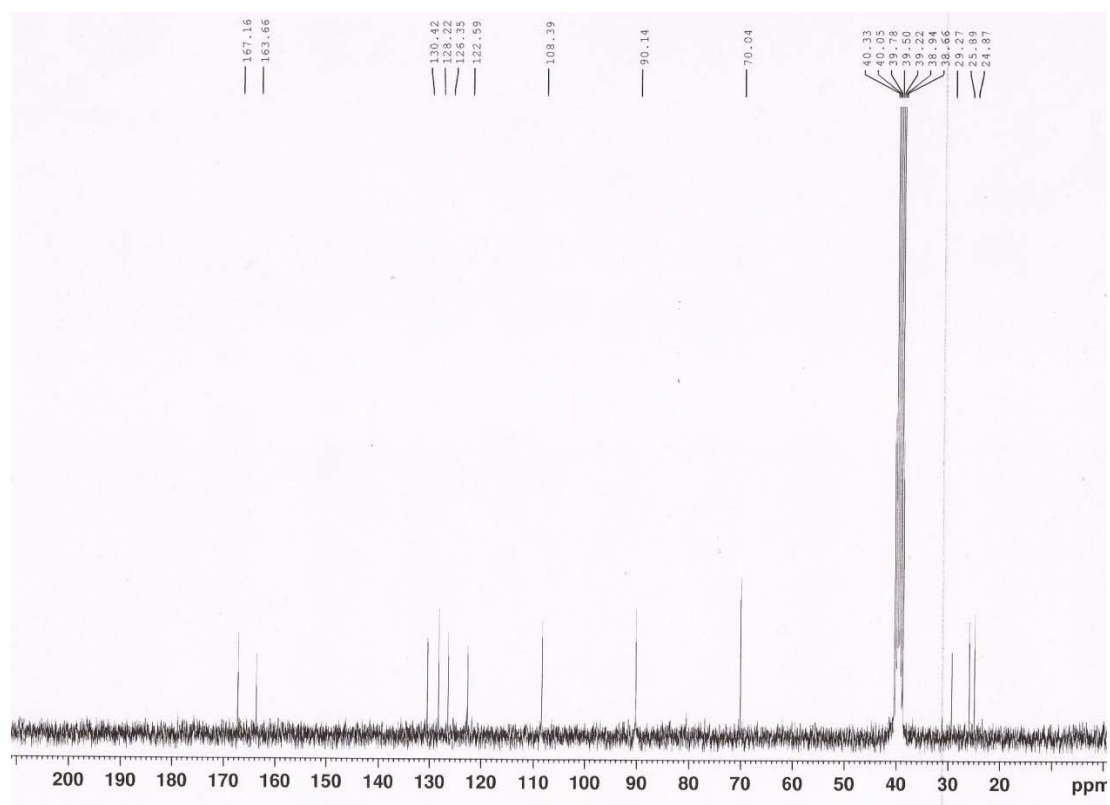

Figure S36.  $^{13}\text{C}$  spectrum of compound **6a** (DMSO, 75.4 MHz).

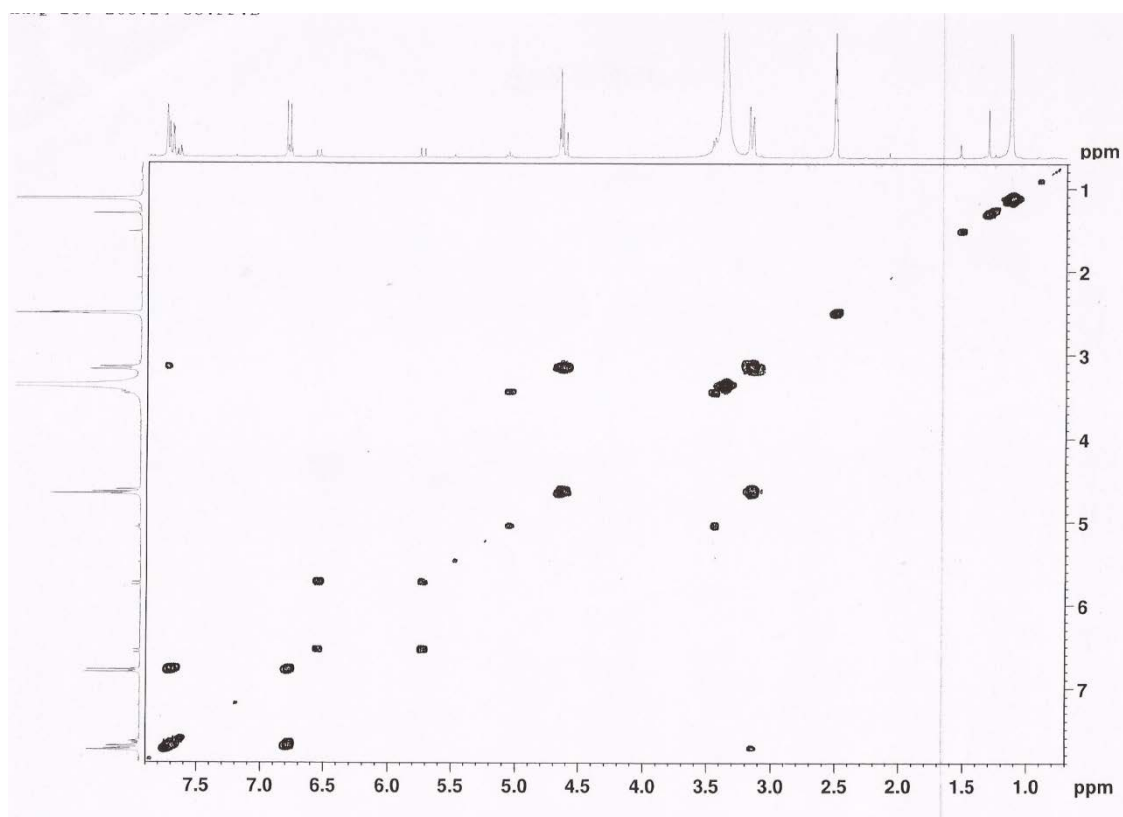

Figure S37. COSY spectrum of compound **6a** (DMSO, 300.13 MHz).

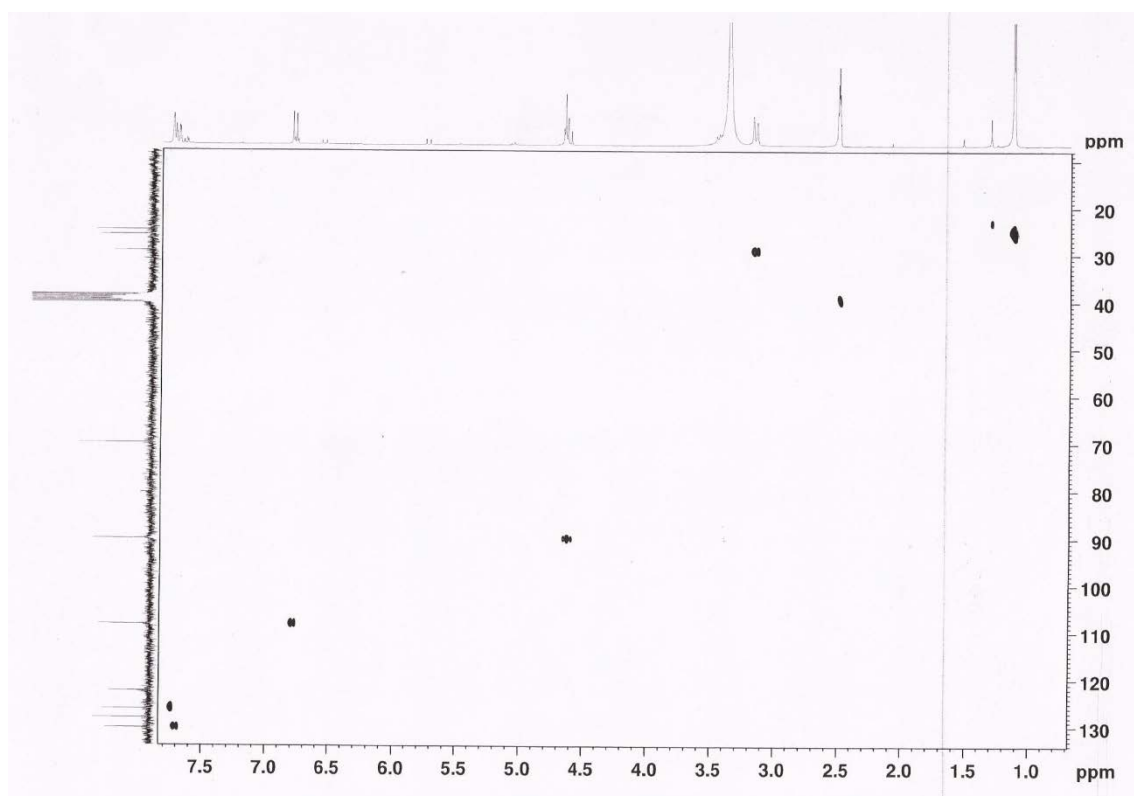

Figure S38. HSQC spectrum of compound 6a (DMSO, 300.13 MHz).

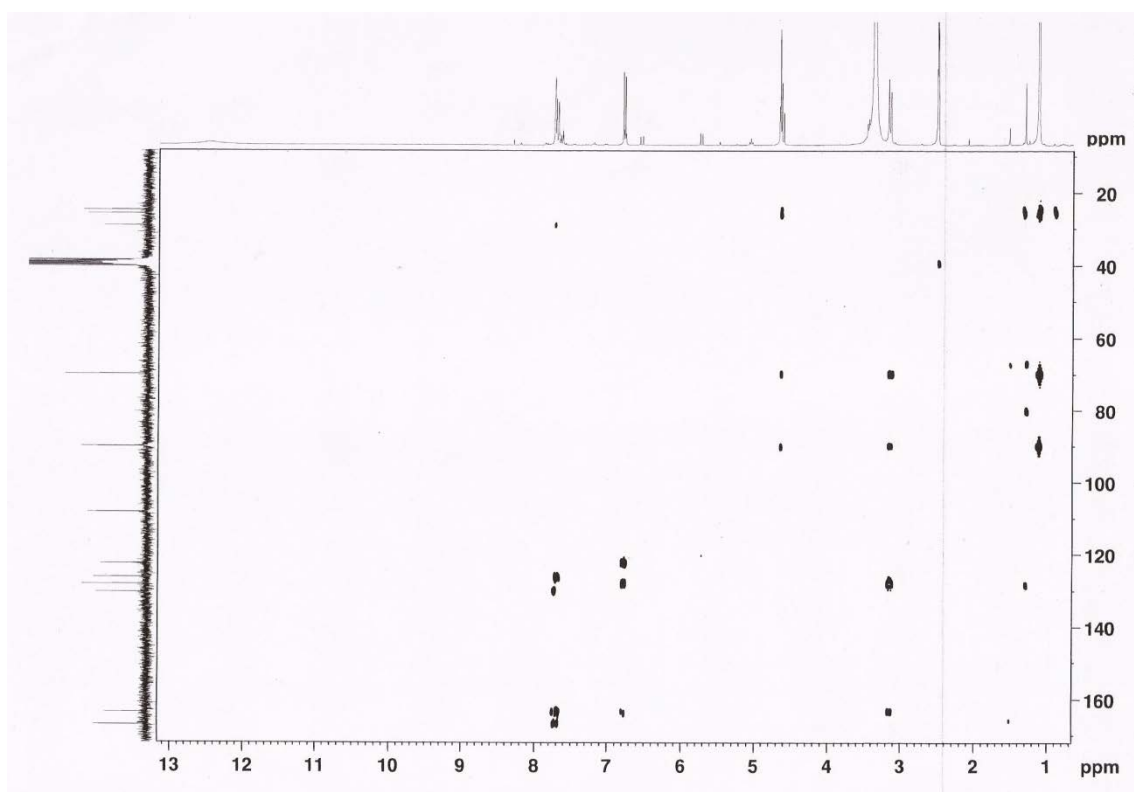

Figure S39. HMBC spectrum of compound 6a (DMSO, 300.13 MHz).

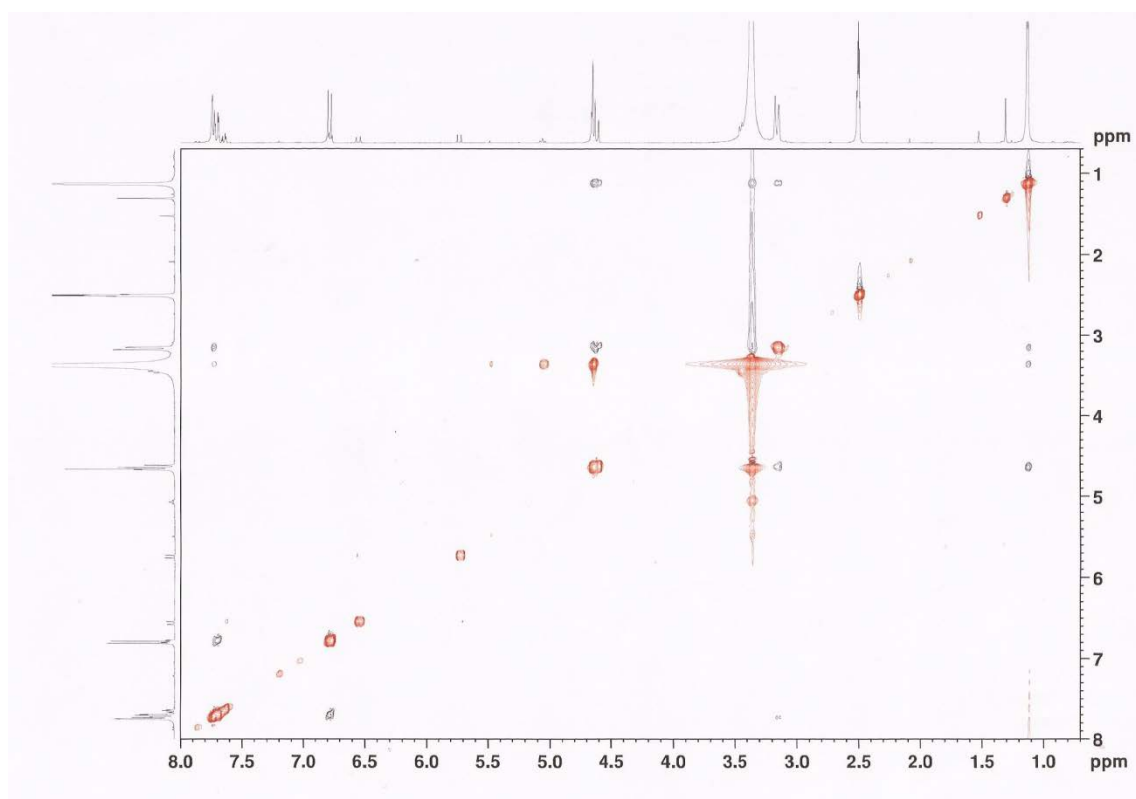

Figure S40. NOESY spectrum of compound **6a** (DMSO, 300.13 MHz).

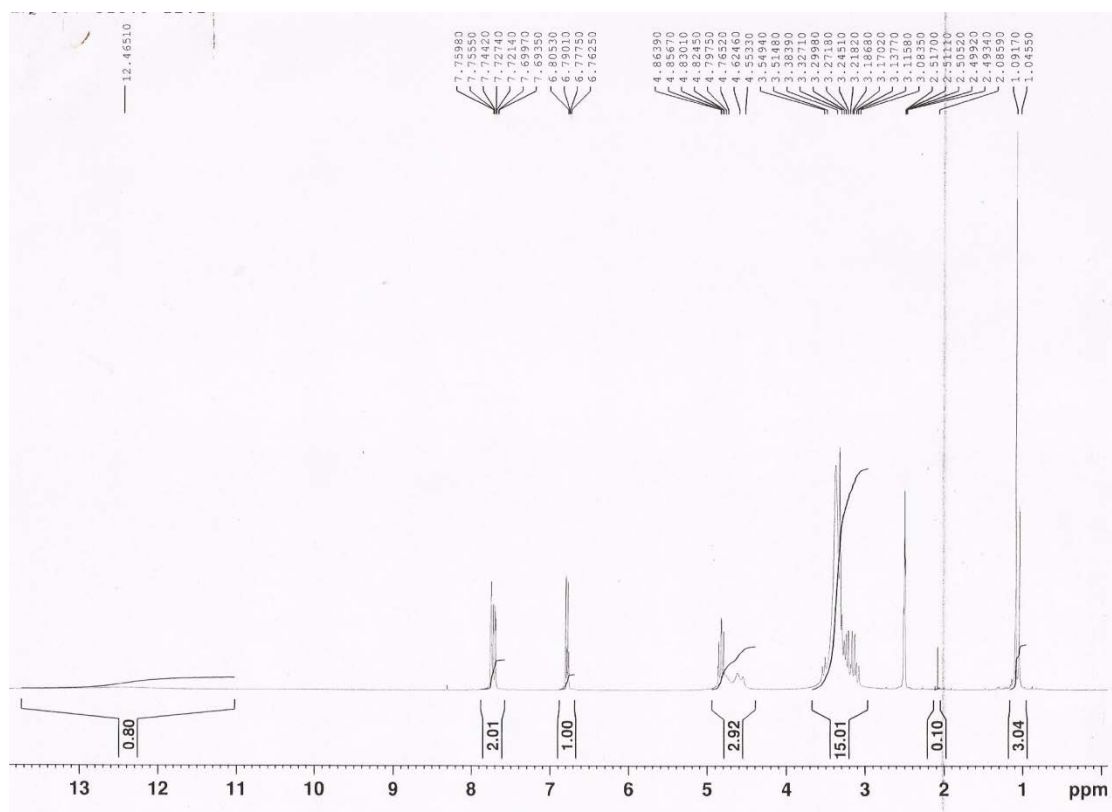

Figure S41.  $^1\text{H}$  spectrum of compound **6b** (DMSO, 300.13 MHz).

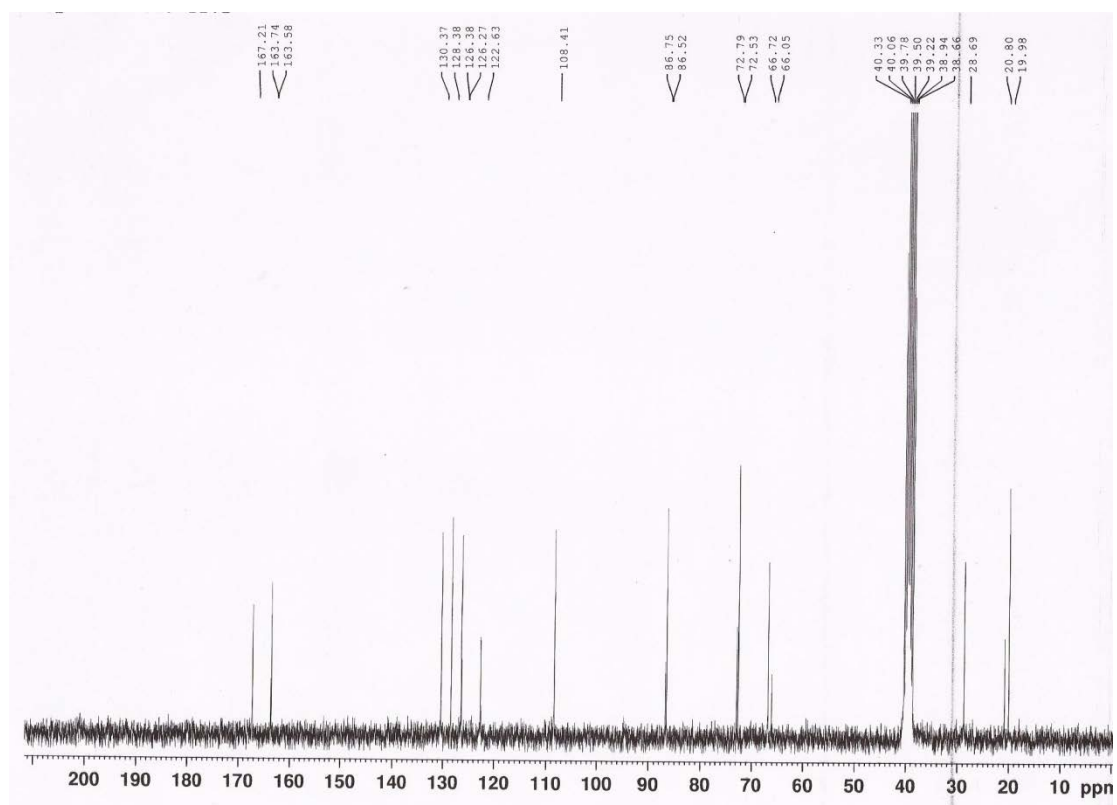

Figure S42.  $^{13}\text{C}$  spectrum of compound **6b** (DMSO, 75.4 MHz).

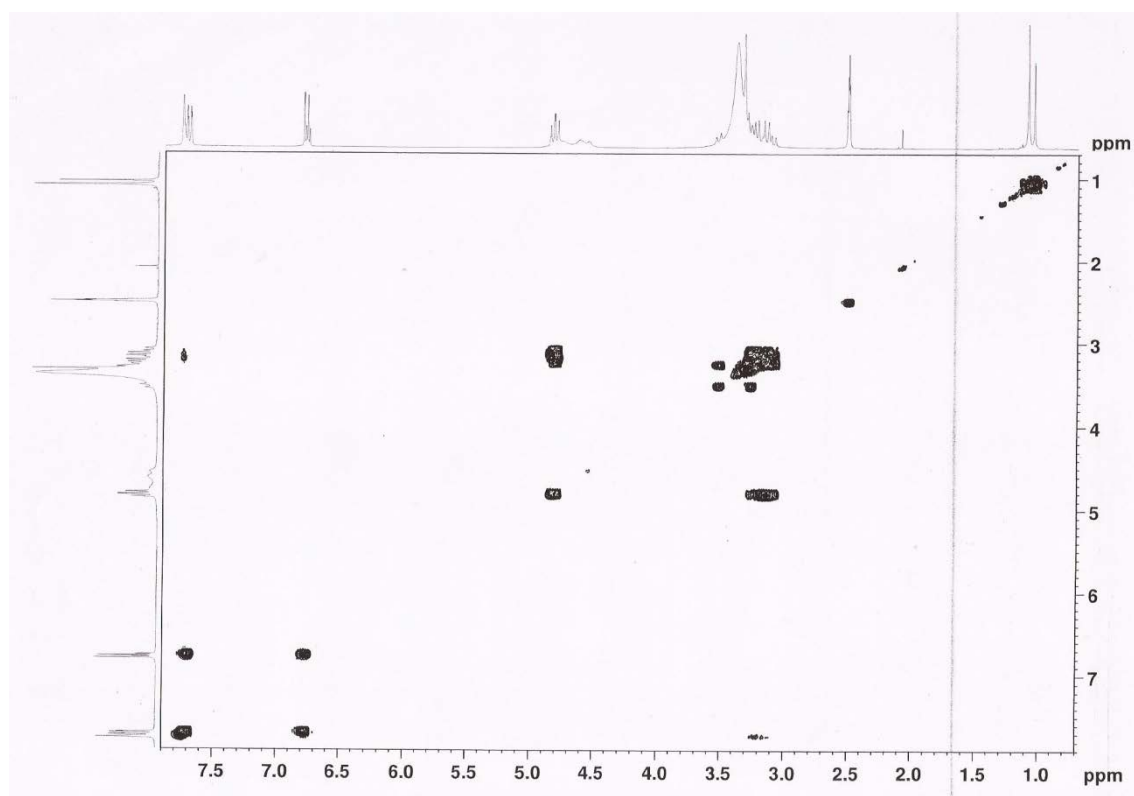

Figure S43. COSY spectrum of compound **6b** (DMSO, 300.13 MHz).

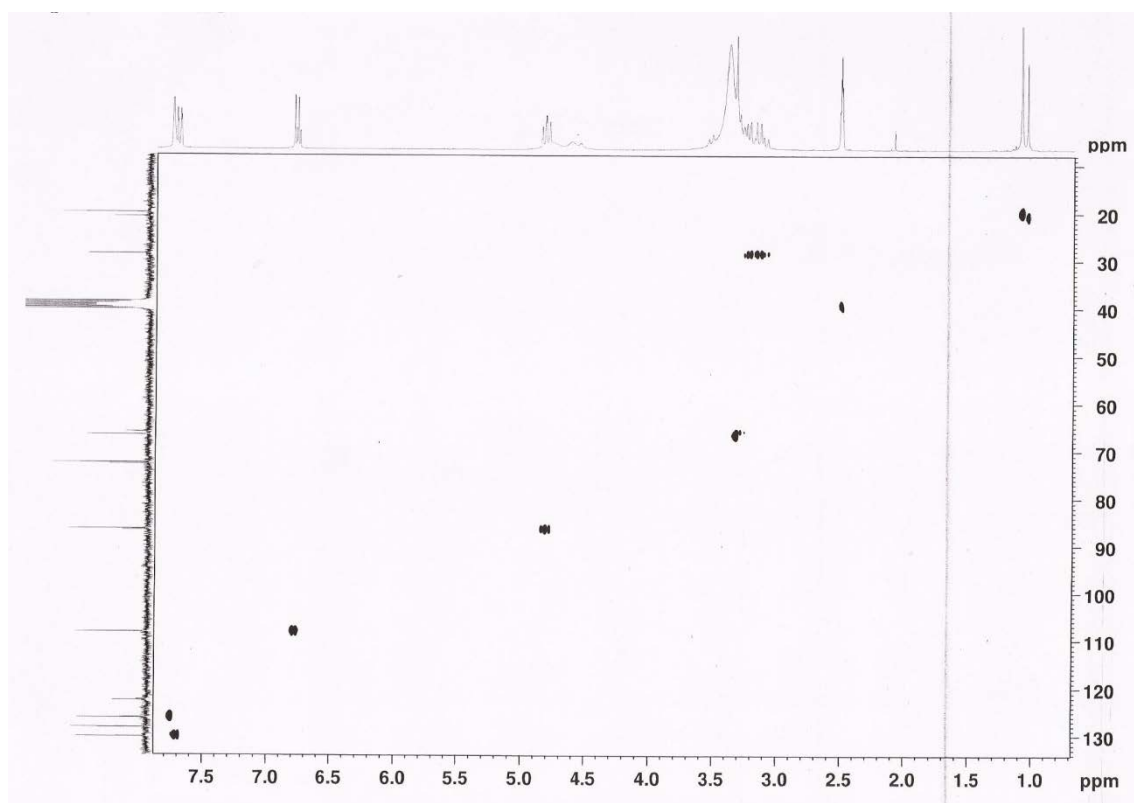

Figure S44. HSQC spectrum of compound **6b** (DMSO, 300.13 MHz).

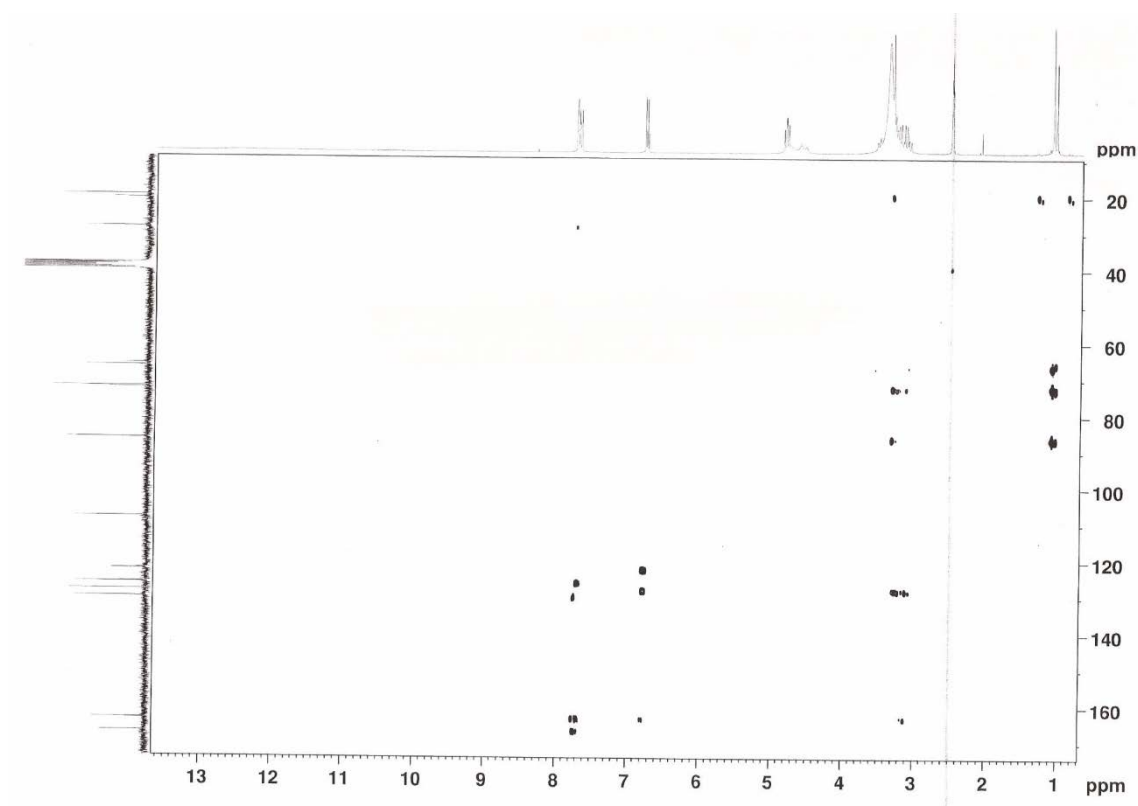

Figure S45. HMBC spectrum of compound **6b** (DMSO, 300.13 MHz).

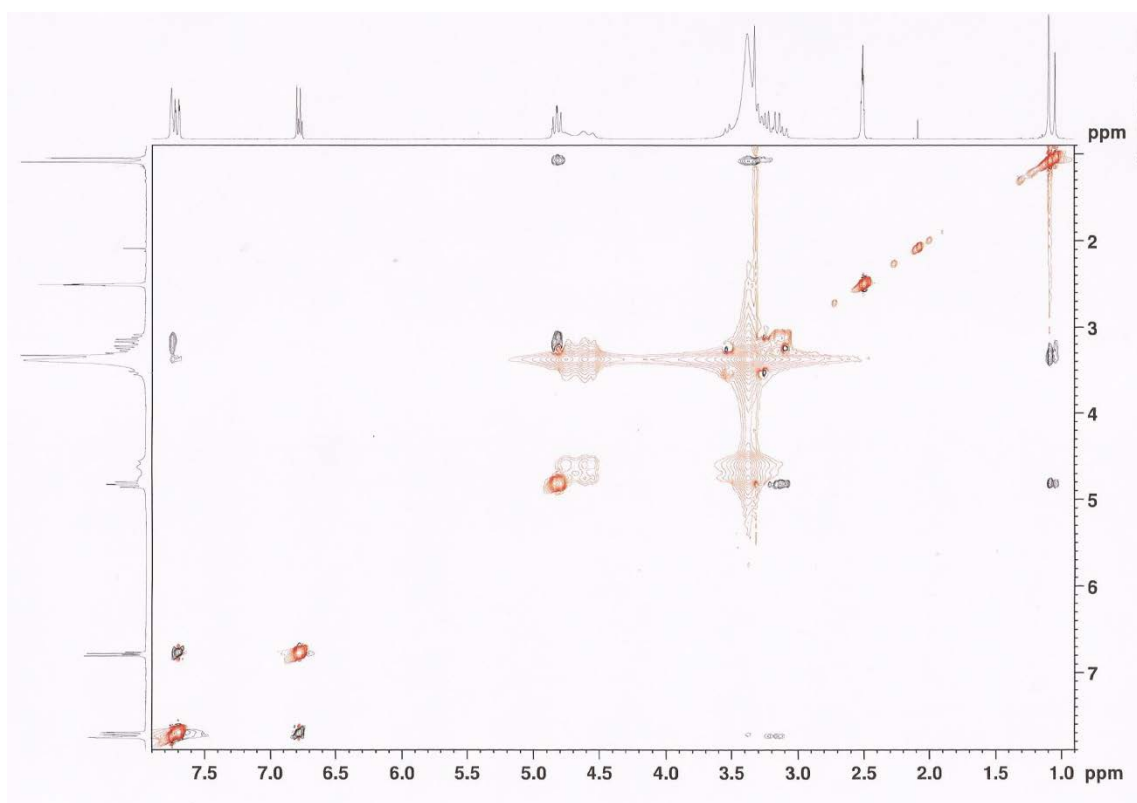

Figure S46. NOESY spectrum of compound **6b** (DMSO, 300.13 MHz).

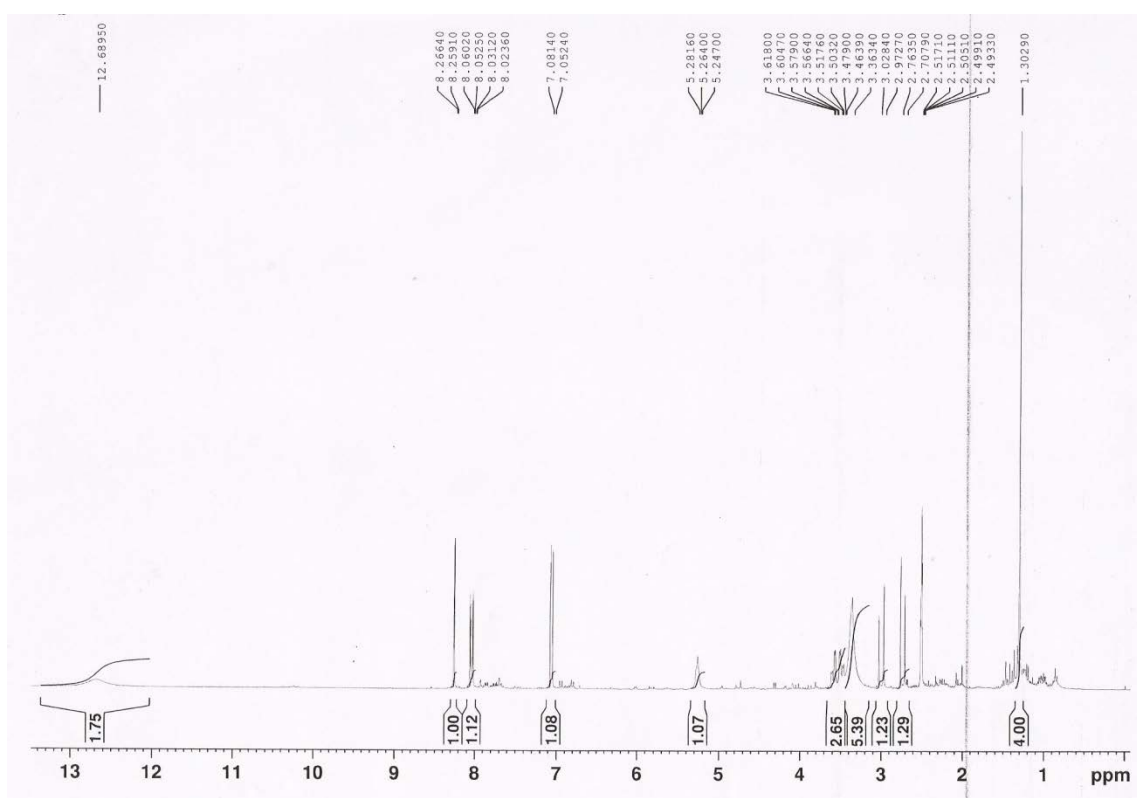

Figure S47.  $^1\text{H}$  NMR spectrum of compound **7** ( $\text{CDCl}_3$ , 300.13 MHz).



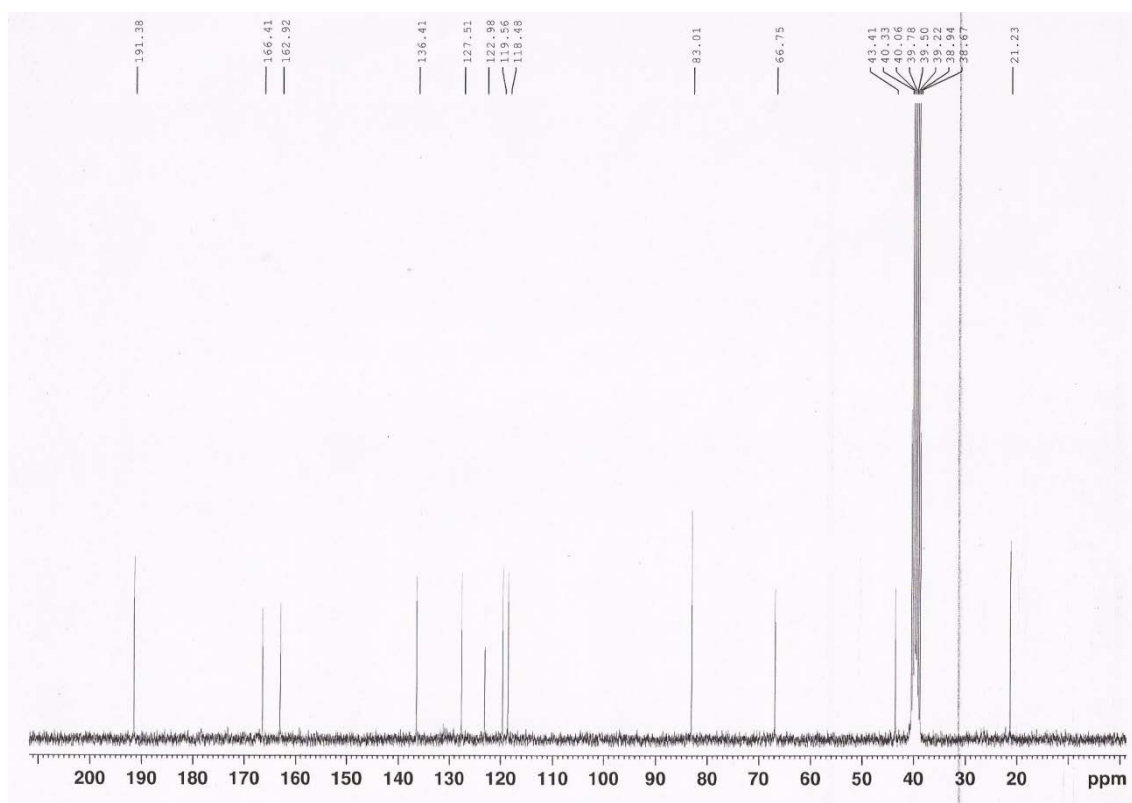

Figure S48.  $^{13}\text{C}$ NMR spectrum of compound 7 ( $\text{CDCl}_3$ , 75.4 MHz).

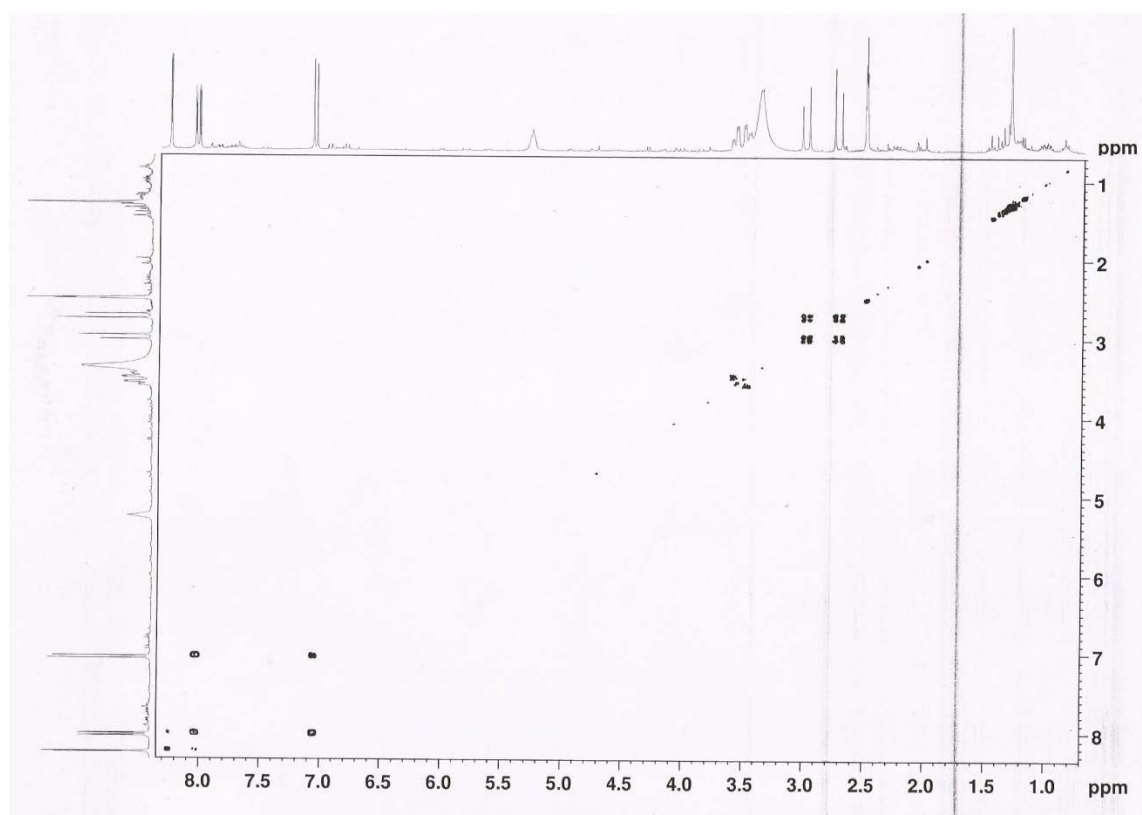

Figure S49. COSY spectrum of compound 7 ( $\text{CDCl}_3$ , 75.4 MHz).

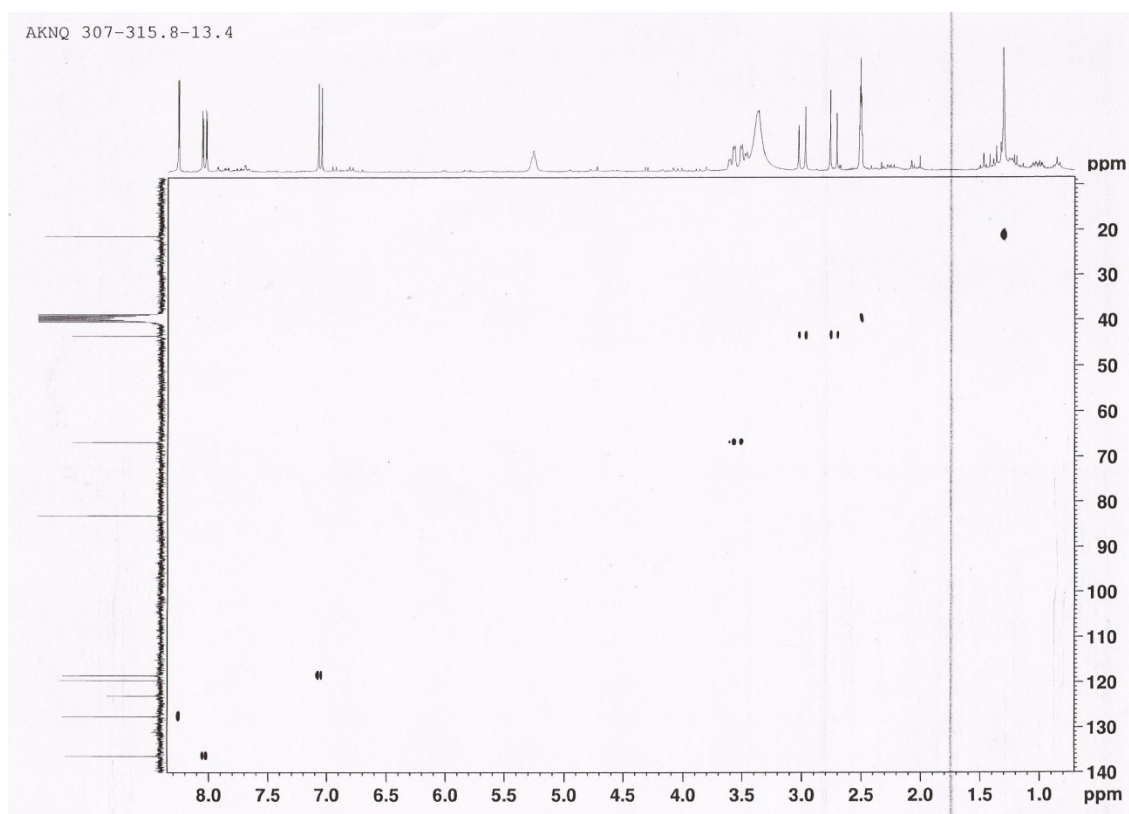

**Figure S50.** HSQC spectrum of compound **7** (CDCl<sub>3</sub>, 75.4 MHz).

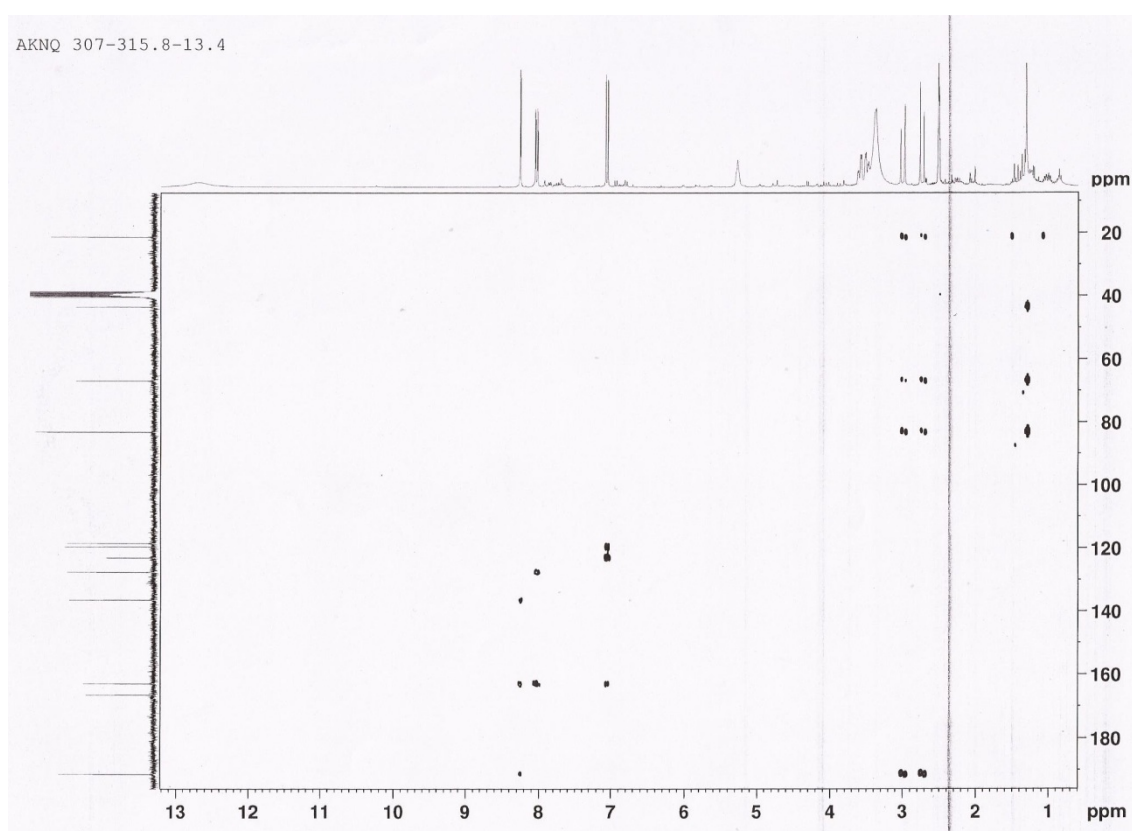

**Figure 51S.** HMBC spectrum of compound **7** (CDCl<sub>3</sub>, 75.4 MHz).

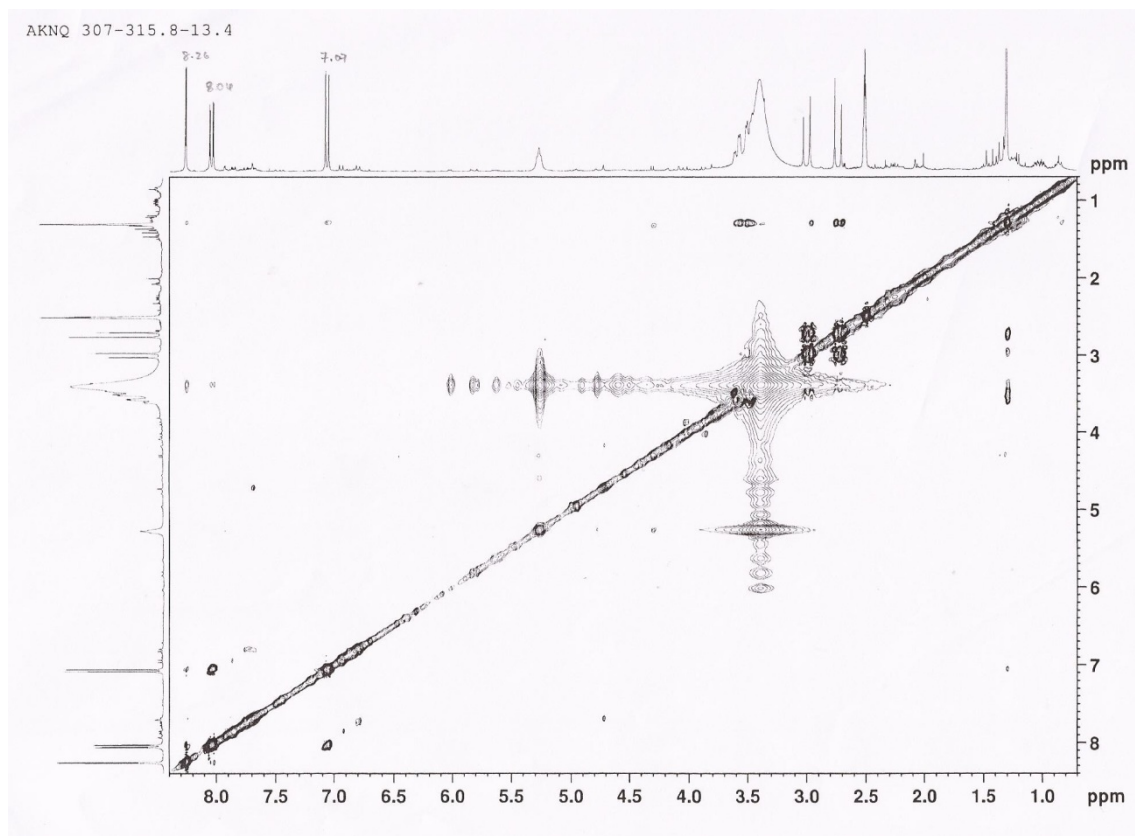

**Figure S52.** NOESY spectrum of compound **7** (CDCl<sub>3</sub>, 75.4 MHz).
